# Supplementary material for: Cu-catalyzed in situ generation of thiol using xanthate as a thiol surrogate for the one-pot synthesis of benzothiazoles and benzothiophenes
Source: Royal Society of Chemistry journal article supplement (doi:10.1039/c3ob26915a), 2013-01-01
Supplement: c3ob26915a.pdf [file c3ob26915a.pdf]

Supplementary Material (ESI) for Organic & Biomolecular Chemistry  
This journal is (c) The Royal Society of Chemistry 2012

## Supplementary data

### **Cu-catalyzed *in situ* generation of thiol using xanthate as thiol surrogate for the one-pot synthesis of benzothiazoles and benzothiophenes**

D. J. C. Prasad and G. Sekar\*

*Department of Chemistry, Indian Institute of Technology Madras, Chennai,  
Tamilnadu-600 036, India*

[gsekar@iitm.ac.in](mailto:gsekar@iitm.ac.in)

### **Table of contents**

|                                                                                 |    |
|---------------------------------------------------------------------------------|----|
| • General considerations                                                        | 2  |
| • Typical experimental procedure for synthesis of 2-iodoanilides                | 2  |
| • Typical experimental procedure for synthesis of <i>o</i> -haloalkynylbenzenes | 6  |
| • References                                                                    | 9  |
| • <sup>1</sup> H and <sup>13</sup> C spectra for all compounds                  | 10 |

## General considerations

Cu(OAc)<sub>2</sub>.H<sub>2</sub>O was purchased from Merck, India and oven dried to obtain anhydrous Cu(OAc)<sub>2</sub>. Aryl halides, acid chlorides, alkynes and potassium ethyl xanthogenate were purchased from sigma Aldrich Chemical Company. All the solvents used for the reactions were obtained from Rankem, India and dried by Vogel's procedure. Reaction temperatures were controlled by Varivolt temperature modulator, Thin-layer chromatography (TLC) was performed using Merck silica gel 60 F<sub>254</sub> precoated plates (0.25 mm) and visualized by UV fluorescence quenching. Silica gel (particle size 100-200 mesh) purchased from SRL India was used for chromatography. <sup>1</sup>H and <sup>13</sup>C NMR spectra were recorded on a Bruker 400 MHz instrument. <sup>1</sup>H NMR spectra were reported relative to Me<sub>4</sub>Si (δ 0.0 ppm) or residual CHCl<sub>3</sub> (δ 7.26 ppm). <sup>13</sup>C NMR were reported relative to CDCl<sub>3</sub> (δ 77.16 ppm). FTIR spectra were recorded on a Nicolet 6700 spectrometer and are reported in frequency of absorption (cm<sup>-1</sup>). High resolution mass spectra (HRMS) were recorded on Q-ToF Micro mass spectrometer.

### Typical experimental procedure for synthesis of 2-iodoanilides

To a solution of *o*-iodoaniline (2 mmol) in dry THF (10 mL), acid chloride (2.4 mmol) was added and the resulting mixture was stirred at room temperature for 12 hours.<sup>1</sup> Then, ethyl acetate was added and the organic layer was washed twice with saturated NaHCO<sub>3</sub>, once with brine, twice with HCl (2N aqueous solution), then dried over anhydrous Na<sub>2</sub>SO<sub>4</sub> and concentrated. The crude residue was purified by column chromatography.

### *N*-(2-Iodophenyl)benzamide (2)<sup>1</sup>

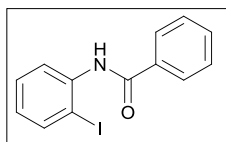

White solid; mp 132-133 °C (lit. 133–134 °C); *R<sub>f</sub>* 0.44 (1:9 ethyl acetate : hexanes); <sup>1</sup>H NMR (400 MHz, CDCl<sub>3</sub>): δ 6.86-6.93 (m, 1H), 7.38-7.45 (m, 1H), 7.50-7.63 (m, 3H), 7.82 (dd, *J* = 0.4 & 7.8 Hz, 1H), 7.95-8.00 (m, 2H), 8.30 (bs, 1H), 8.46 (dd, *J* = 0.8 & 8.0 Hz, 1H); <sup>13</sup>C NMR (100 MHz, CDCl<sub>3</sub>): δ 90.5, 116.1, 116.3, 122.0, 126.3, 129.6, 129.7, 129.8, 138.2, 139.0, 164.4; FTIR (neat): 3400, 1668, 1035 cm<sup>-1</sup>; HRMS: *m/z* [M+H]<sup>+</sup> calcd for C<sub>13</sub>H<sub>11</sub>NOI: 323.9885; found: 323.9884.

### ***N*-(2-Iodophenyl)-4-methoxybenzamide (4)<sup>2</sup>**

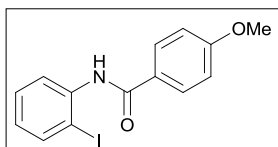

White solid; mp 150–153 °C (lit. 151–152 °C);  $R_f$  0.32 (1:9 ethyl acetate : hexanes);  $^1\text{H}$  NMR (400 MHz,  $\text{CDCl}_3$ ):  $\delta$  3.88 (s, 3H), 6.81–6.89 (m, 1H), 6.97–7.05 (m, 2H), 7.35–7.41 (m, 1H), 7.80 (dd,  $J = 1.6$  & 7.8 Hz, 1H), 7.91–7.96 (m, 2H), 8.20 (bs, 1H), 8.44 (dd,  $J = 1.6$  & 8.4 Hz, 1H);  $^{13}\text{C}$  NMR (100 MHz,  $\text{CDCl}_3$ ):  $\delta$  55.7, 90.3, 114.4, 121.9, 125.9, 127.1, 129.3, 129.6, 138.8, 138.9, 163.0, 165.0; FTIR (neat): 3281, 1649, 1026, 843, 759  $\text{cm}^{-1}$ ; HRMS:  $m/z$   $[\text{M}+\text{Na}]^+$  calcd for  $\text{C}_{14}\text{H}_{12}\text{NO}_2\text{NaI}$ : 375.9811, found: 375.9813.

### ***N*-(2-Iodophenyl)-3-methoxybenzamide (6)<sup>3</sup>**

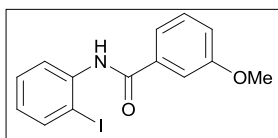

White solid; mp 95 °C (lit. 94–95.5 °C);  $R_f$  0.33 (1:9 ethyl acetate : hexanes);  $^1\text{H}$  NMR (400 MHz,  $\text{CDCl}_3$ ):  $\delta$  3.9 (s, 3H), 6.86–6.93 (m, 1H), 7.10–7.15 (m, 1H), 7.38–7.47 (m, 2H), 7.49–7.55 (m, 2H), 7.83 (dd,  $J = 1.6$  & 8.0 Hz, 1H), 8.29 (bs, 1H), 8.46 (dd,  $J = 1.2$  & 8.0 Hz, 1H);  $^{13}\text{C}$  NMR (100 MHz,  $\text{CDCl}_3$ ):  $\delta$  55.7, 90.3, 112.7, 118.6, 119.0, 121.9, 126.2, 129.5, 130.1, 136.2, 138.4, 139.0, 160.2, 165.3; FTIR (neat): 3400, 1668, 1035, 750  $\text{cm}^{-1}$ ; HRMS:  $m/z$   $[\text{M}+\text{Na}]^+$  calcd for  $\text{C}_{14}\text{H}_{12}\text{NO}_2\text{NaI}$ : 375.9810; found: 359.9806.

### ***N*-(2-Iodophenyl)-2-methylbenzamide (8)<sup>4</sup>**

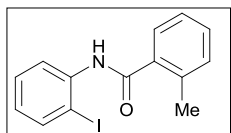

White solid; mp 100–101 °C (Lit. 101–102 °C);  $R_f$  0.48 (1:9 ethyl acetate : hexanes);  $^1\text{H}$  NMR (400 MHz,  $\text{CDCl}_3$ ):  $\delta$  2.6 (s, 3H), 6.89 (td,  $J = 1.2$  & 7.6, 1H), 7.25–7.36 (m, 2H), 7.38–7.45 (m, 2H), 7.58–7.65 (m, 1H), 7.82 (dd,  $J = 1.2$  & 8.0 Hz, 2H), 8.38–8.46 (m, 1H);  $^{13}\text{C}$  NMR (100 MHz,  $\text{CDCl}_3$ ):  $\delta$  20.3, 90.4, 122.2, 126.2, 126.3, 126.9, 129.5, 130.8, 131.7, 136.0, 137.1, 138.6, 139.0, 168.0; FTIR (neat): 3260, 1654, 1047, 752, 672  $\text{cm}^{-1}$ ; HRMS:  $m/z$   $[\text{M}+\text{Na}]^+$  calcd for  $\text{C}_{14}\text{H}_{12}\text{NONaI}$ : 359.9861; found: 359.9863.

### **4-Fluoro-*N*-(2-iodophenyl)benzamide (10)<sup>5</sup>**

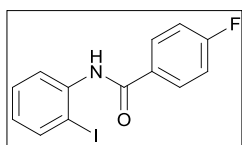

White solid; mp 113–115 °C (lit. 114–118 °C);  $R_f$  0.44 (1:9 ethyl acetate : hexanes);  $^1\text{H}$  NMR (400 MHz,  $\text{CDCl}_3$ ):  $\delta$  6.89 (td,  $J = 1.2$  & 7.6 Hz, 1H), 7.10–7.27 (m, 2H), 7.37–7.44 (m, 1H), 7.82 (dd,  $J = 1.2$  & 7.6 Hz, 1H), 7.91–7.96 (m, 2H), 8.20 (bs, 1H), 8.44 (dd,  $J = 1.6$  & 8.4 Hz, 1H);  $^{13}\text{C}$  NMR (100 MHz,  $\text{CDCl}_3$ ):  $\delta$  55.7, 90.3, 114.4, 121.9, 125.9, 127.1, 129.3, 129.6, 138.8, 138.9, 163.0, 165.0; FTIR (neat): 3281, 1649, 1026, 843, 759  $\text{cm}^{-1}$ ; HRMS:  $m/z$   $[\text{M}+\text{Na}]^+$  calcd for  $\text{C}_{14}\text{H}_{11}\text{FNO}_2\text{NaI}$ : 375.9711, found: 375.9713.

=1.2 & 8.0 Hz, 1H), 7.94-8.03 (m, 2H), 8.22 (bs, 1H), 8.41 (dd,  $J = 1.2$  & 8.2 Hz, 1H);  $^{13}\text{C}$  NMR (100 MHz,  $\text{CDCl}_3$ ):  $\delta$  90.5, 116.2 (d,  $J = 22.0$  Hz), 121.9, 126.3, 129.6 (d,  $J = 8.6$  Hz), 129.8, 130.9, 138.2, 139.0, 164.4, 165.3 (d,  $J = 249.6$  Hz); FTIR (neat): 3275, 1648, 1020, 758  $\text{cm}^{-1}$ ; HRMS:  $m/z$   $[\text{M}+\text{Na}]^+$  calcd for  $\text{C}_{13}\text{H}_9\text{NONaFI}$ : 363.9611, found: 363.9616.

### ***N*-(2-Iodo-4-methylphenyl)benzamide (12)**

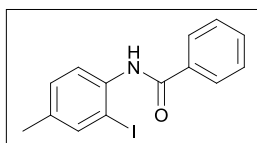

White solid; mp 160-162 °C;  $R_f$  0.31 (1:19 ethyl acetate : hexanes);  $^1\text{H}$  NMR (400 MHz,  $\text{CDCl}_3$ ):  $\delta$  2.31 (s, 3H), 7.21 (d,  $J = 7.6$  Hz, 1H), 7.49-7.61 (m, 3H), 7.65 (d,  $J = 0.8$  Hz, 1H), 7.94-7.99 (m, 2H), 8.21 (bs, 1H), 8.29 (d,  $J = 8.4$  Hz, 1H);  $^{13}\text{C}$  NMR (100 MHz,  $\text{CDCl}_3$ ):  $\delta$  20.5, 90.5, 121.7, 127.3, 129.1, 130.2, 132.2, 134.8, 135.9, 136.2, 139.1, 165.4; IR (neat): 3252, 3055, 3000, 1648, 818, 711  $\text{cm}^{-1}$ ; HRMS ( $m/z$ ):  $[\text{M}+\text{Na}]^+$  calcd. for  $\text{C}_{14}\text{H}_{12}\text{NONaI}$ : 359.9861; found: 359.9875.

### ***N*-(2-Iodophenyl)pivalamide (14)<sup>6</sup>**

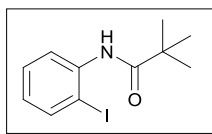

White solid; mp 68-69 °C (lit. 67-69 °C);  $R_f$  0.70 (1:9 ethyl acetate : hexanes);  $^1\text{H}$  NMR (400 MHz,  $\text{CDCl}_3$ ):  $\delta$  1.29 (s, 9H), 6.70-6.82 (m, 1H), 7.22-7.31 (m, 1H), 7.64-7.83 (m, 1H), 8.21 (d,  $J = 8.4$  Hz, 1H);  $^{13}\text{C}$  NMR (100 MHz,  $\text{CDCl}_3$ ):  $\delta$  29.0, 41.0, 92.0, 123.0, 127.0, 130.0, 139.0, 139.5, 174.0; FTIR (neat): 2932, 1556, 1170, 735  $\text{cm}^{-1}$ .

### ***N*-(2-Iodophenyl)propionamide (16)**

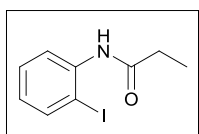

White solid; mp 94-95 °C;  $R_f$  0.37 (1:9 ethyl acetate : hexanes);  $^1\text{H}$  NMR (400 MHz,  $\text{CDCl}_3$ ):  $\delta$  1.29 (t,  $J = 7.6$  Hz, 3H), 2.47 (q,  $J = 7.6$  Hz, 2H), 6.80-6.87 (m, 1H), 7.31-7.37 (m, 1H), 7.46 (bs, 1H), 7.77 (dd,  $J = 8.0$  & 1.2 Hz, 1H), 8.24 (d,  $J = 7.6$  Hz, 1H);  $^{13}\text{C}$  NMR (100 MHz,  $\text{CDCl}_3$ ):  $\delta$  9.8, 31.2, 90.1, 122.1, 125.9, 129.4, 138.3, 138.9, 172.1; IR (neat): 3276, 3025, 2969, 2934,

2873, 1656, 760, 671  $\text{cm}^{-1}$ ; HRMS ( $m/z$ ):  $[\text{M}+\text{H}]^+$  calcd. for  $\text{C}_9\text{H}_{11}\text{NOI}$ : 275.9885; found: 275.9893.

#### ***N*-(4-benzoyl-2-iodophenyl)benzamide (18)**

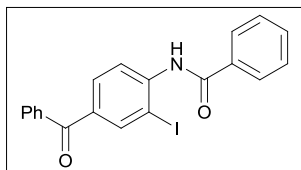

White solid; mp 162-163 °C;  $R_f$  0.36 (1:9 ethyl acetate : hexanes);  $^1\text{H}$  NMR (400 MHz,  $\text{CDCl}_3$ ):  $\delta$  7.48-7.66 (m, 6H), 7.76-7.81 (m, 2H), 7.83 (d,  $J = 8.4$  Hz, 1H), 7.97-8.03 (m, 2H), 8.36 (d,  $J = 1.6$  Hz, 1H), 8.56 (bs, 1H), 8.65 (d,  $J = 8.4$  Hz, 1H);  $^{13}\text{C}$  NMR (100 MHz,  $\text{CDCl}_3$ ):  $\delta$  89.5, 120.0, 127.4, 128.6, 129.2, 130.0, 130.3, 132.0, 132.8, 134.2, 134.6, 137.4, 140.7, 141.9, 165.5, 194.2; IR (neat): 3286, 3059, 1659, 1650, 799, 724, 701  $\text{cm}^{-1}$ ; HRMS ( $m/z$ ):  $[\text{M}+\text{H}]^+$  calcd. for  $\text{C}_{20}\text{H}_{15}\text{NO}_2\text{I}$ : 428.0148; found: 428.0136.

#### **Methyl 4-benzamido-3-iodobenzoate (20)<sup>7</sup>**

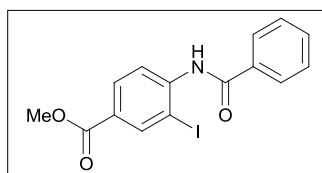

White solid; mp 146-147 °C (lit. 144-146 °C);  $R_f$  0.40 (1:9 ethyl acetate : hexanes);  $^1\text{H}$  NMR (400 MHz,  $\text{CDCl}_3$ ):  $\delta$  3.92 (s, 3H), 7.50-7.65 (m, 3H), 7.95-8.01 (m, 2H), 8.07 (dd,  $J = 8.8$  & 1.6 Hz, 1H), 8.50 (d,  $J = 2.0$  Hz, 1H), 8.52 (bs, 1H), 8.63 (d,  $J = 8.8$  Hz, 1H);  $^{13}\text{C}$  NMR (100 MHz,  $\text{CDCl}_3$ ):  $\delta$  52.5, 88.9, 120.2, 127.2, 127.4, 129.2, 131.2, 132.7, 134.3, 140.4, 142.3, 165.4, 165.5; IR (neat): 3378, 2957, 2923, 2853, 1710, 1683, 763, 699  $\text{cm}^{-1}$ ; HRMS ( $m/z$ ):  $[\text{M}+\text{H}]^+$  calcd. for  $\text{C}_{15}\text{H}_{13}\text{NO}_3\text{I}$ : 381.9940; found: 381.9945.

#### ***N*-(5-Fluoro-2-iodophenyl)-3,4-dimethoxybenzamide (24)**

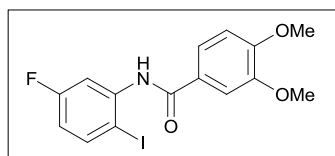

White solid; mp 166-168 °C;  $R_f$  0.27 (1:4 ethyl acetate : hexanes);  $^1\text{H}$  NMR (400 MHz,  $\text{CDCl}_3$ ):  $\delta$  3.96 (s, 3H), 3.97 (s, 3H), 6.62-6.69 (m, 1H), 6.96 (d,  $J = 8.0$  Hz, 1H), 7.51 (dd,  $J = 8.4$  & 2.4 Hz, 1H), 7.54 (d,  $J = 2.0$  Hz, 1H), 7.73 (dd,  $J = 8.4$  & 6.0 Hz, 1H), 8.30 (bs, 1H), 8.37 (dd,  $J = 11.2$  & 2.8 Hz, 1H);  $^{13}\text{C}$  NMR (100 MHz,  $\text{CDCl}_3$ ):  $\delta$  56.19, 56.24, 82.4, 108.9 (d,  $J = 28.6$  Hz), 110.7, 110.8, 113.0 (d,  $J = 22.5$  Hz), 119.9, 126.8, 139.2 (d,  $J = 8.9$  Hz), 139.8 (d,  $J = 11.8$  Hz), 149.5, 152.7, 163.5 (d,  $J = 224.8$  Hz), 164.9; IR

(neat): 3385, 3061, 3011, 2931, 2837, 1665, 745  $\text{cm}^{-1}$ ; HRMS ( $m/z$ ):  $[\text{M}+\text{H}]^+$  calcd. for  $\text{C}_{15}\text{H}_{14}\text{NO}_3\text{FI}$ : 402.0002; found: 402.0004.

### Typical experimental procedure for synthesis of *o*-haloalkynylbenzenes

A solution of  $\text{Et}_3\text{N}$  (12.5 mL),  $\text{PdCl}_2(\text{PPh}_3)_2$  (2 mol%),  $\text{CuI}$  (1 mol%), 1,2-dihalobenzene (5 mmol) and terminal alkyne (6 mmol) was stirred for 5 minutes before flushing with  $\text{N}_2$  and then the round bottom flask was closed.<sup>8</sup> The reaction mixture was allowed to stir at room temperature for 8-12 hours and the resulting solution was filtered and washed with saturated aq.  $\text{NaCl}$  solution and extracted with ethyl acetate (2 x 15 mL). The combined organic fractions were dried over anhydrous  $\text{Na}_2\text{SO}_4$  and then the solvent was removed under reduced pressure. The crude product was purified by column chromatography on silica gel using ethyl acetate/hexanes as eluents.

#### 1-Iodo-2-(phenylethynyl)benzene (31)<sup>8</sup>

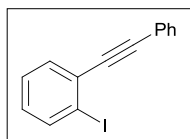

Pale yellow oil;  $R_f$  0.64 (in hexanes);  $^1\text{H}$  NMR (400 MHz,  $\text{CDCl}_3$ ):  $\delta$  6.99-7.05 (m, 1H), 7.31-7.40 (m, 4H), 7.52-7.56 (m, 1H), 7.59-7.64 (m, 2H), 7.89 (d,  $J = 8.0$  Hz, 1H);  $^{13}\text{C}$  NMR (100 MHz,  $\text{CDCl}_3$ ):  $\delta$  91.8, 93.2, 101.3, 123.0, 127.9, 128.5, 128.8, 129.5, 129.9, 131.8, 132.6, 138.9; IR (neat): 3057, 2955, 2924, 2218, 753, 689  $\text{cm}^{-1}$ ; HRMS ( $m/z$ ):  $[\text{M}+\text{H}]^+$  calcd. for  $\text{C}_{14}\text{H}_{10}\text{I}$ : 304.9827; found: 304.9820.

#### 1-Iodo-2-(*p*-tolylethynyl)benzene (33)<sup>9</sup>

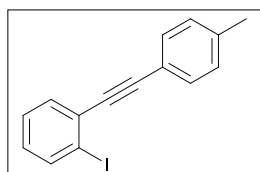

White solid; mp 89-90  $^\circ\text{C}$  (lit. 88-90  $^\circ\text{C}$ );  $R_f$  0.60 (in hexanes);  $^1\text{H}$  NMR (400 MHz,  $\text{CDCl}_3$ ):  $\delta$  2.38 (s, 3H), 6.96-7.04 (m, 1H), 7.18 (d,  $J = 7.6$  Hz, 2H), 7.33 (t,  $J = 7.6$  Hz, 1H), 7.47-7.57 (m, 3H), 7.88 (d,  $J = 8.0$  Hz, 1H);  $^{13}\text{C}$  NMR (100 MHz,  $\text{CDCl}_3$ ):  $\delta$  21.7, 91.2, 93.5, 101.3, 119.9, 127.9, 129.3, 130.1, 131.7, 132.4, 132.5, 138.8, 139.0; IR (neat): 3050, 2916, 2854, 2213, 814, 755  $\text{cm}^{-1}$ ; HRMS ( $m/z$ ):  $[\text{M}+\text{H}]^+$  calcd. for  $\text{C}_{15}\text{H}_{12}\text{I}$ : 318.9984; found: 318.9972.

### 1-Iodo-2-(*m*-tolylethynyl)benzene (35)

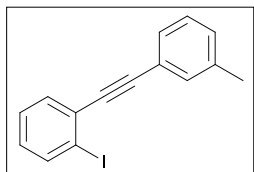

Colorless liquid;  $R_f$  0.70 (in hexanes);  $^1\text{H}$  NMR (400 MHz,  $\text{CDCl}_3$ ):  $\delta$  2.29 (s, 3H), 6.89-6.96 (m, 1H), 7.10 (d,  $J = 7.6$  Hz, 1H), 7.14-7.29 (m, 2H), 7.30-7.36 (m, 2H), 7.42-7.47 (m, 1H), 7.80 (d,  $J = 8.0$  Hz, 1H);  $^{13}\text{C}$  NMR (100 MHz,  $\text{CDCl}_3$ ):  $\delta$  21.4, 91.4, 93.4, 101.3, 122.9, 127.9, 128.4, 128.9, 129.4, 129.7, 130.0, 132.3, 132.5, 138.2, 138.9; IR (neat): 3052, 2921, 2857, 2208, 784, 751, 689  $\text{cm}^{-1}$ ; HRMS ( $m/z$ ):  $[\text{M}+\text{K}]^+$  calcd. for  $\text{C}_{15}\text{H}_{11}\text{KI}$ : 356.9543; found: 356.9543.

### 1-((2-Iodophenyl)ethynyl)-4-methoxy-2-methylbenzene (37)

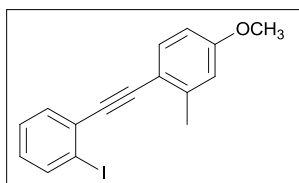

White solid; mp 50-52 °C;  $R_f$  0.38 (in hexanes);  $^1\text{H}$  NMR (400 MHz,  $\text{CDCl}_3$ ):  $\delta$  2.58 (s, 3H), 3.82 (s, 3H), 6.74 (dd,  $J = 8.4$  & 2.8 Hz, 1H), 6.79 (d,  $J = 2.4$  Hz, 1H), 6.99 (td,  $J = 7.6$  & 1.6 Hz, 1H), 7.32 (td,  $J = 7.6$  & 0.8 Hz, 1H), 7.48-7.56 (m, 2H), 7.85-7.90 (m, 1H);  $^{13}\text{C}$  NMR (100 MHz,  $\text{CDCl}_3$ ):  $\delta$  21.7, 55.4, 92.5, 94.0, 100.6, 111.5, 115.1, 115.3, 127.9, 129.0, 130.6, 132.6, 133.7, 138.8, 142.6, 160.0; IR (neat): 3053, 3006, 2962, 2921, 2840, 2203, 811, 749  $\text{cm}^{-1}$ ; HRMS ( $m/z$ ):  $[\text{M}+\text{H}]^+$  calcd. for  $\text{C}_{16}\text{H}_{14}\text{OI}$ : 349.0089; found: 349.0091.

### 1-((4-Fluorophenyl)ethynyl)-2-iodobenzene (39)

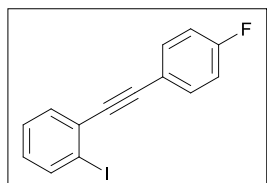

White solid; mp 55-56 °C;  $R_f$  0.70 (in hexanes);  $^1\text{H}$  NMR (400 MHz,  $\text{CDCl}_3$ ):  $\delta$  6.97-7.15 (m, 3H), 7.33 (t,  $J = 7.2$  Hz, 1H), 7.52 (d,  $J = 7.2$  Hz, 1H), 7.55-7.66 (m, 2H), 7.88 (d,  $J = 7.6$  Hz, 1H);  $^{13}\text{C}$  NMR (100 MHz,  $\text{CDCl}_3$ ):  $\delta$  91.5, 92.1, 101.2, 115.9 (d,  $J = 22.0$  Hz), 119.2, 127.9, 129.6, 129.8, 132.5, 133.7 (d,  $J = 8.3$  Hz), 138.9, 162.9 (d,  $J = 248.6$  Hz); IR (neat): 3054, 2985, 2221, 838, 798, 740, 706  $\text{cm}^{-1}$ ; HRMS ( $m/z$ ):  $[\text{M}+\text{H}]^+$  calcd. for  $\text{C}_{14}\text{H}_9\text{IF}$ : 322.9733; found: 322.9747.

### 1-(Cyclohexenylethynyl)-2-iodobenzene (41)

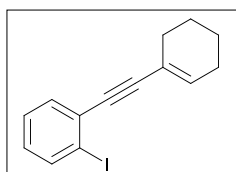

Colorless liquid;  $R_f$  0.72 (in hexanes);  $^1\text{H}$  NMR (400 MHz,  $\text{CDCl}_3$ ):  $\delta$  1.59-1.74 (m, 4H), 2.12-2.20 (m, 2H), 2.25-2.32 (m, 2H), 6.28-

6.33 (m, 1H), 6.95 (td,  $J = 8.0$  & 1.6 Hz, 1H), 7.27 (td,  $J = 8.0$  & 0.8 Hz, 1H), 7.42 (dd,  $J = 7.6$  & 1.6 Hz, 1H), 7.81-7.85 (m, 1H);  $^{13}\text{C}$  NMR (100 MHz,  $\text{CDCl}_3$ ):  $\delta$  21.6, 22.4, 26.0, 29.0, 89.4, 95.2, 101.3, 120.8, 127.9, 128.9, 130.4, 132.3, 136.2, 138.7; IR (neat): 2985, 2940, 2204, 2086, 848, 787, 758  $\text{cm}^{-1}$ ; HRMS ( $m/z$ ):  $[\text{M}+\text{K}]^+$  calcd. for  $\text{C}_{14}\text{H}_{13}\text{KI}$ : 346.9699; found: 346.9695.

### 2-((2-Iodophenyl)ethynyl)pyridine (43)<sup>10</sup>

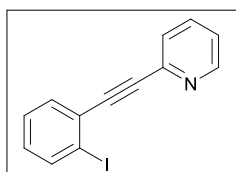

Yellow color liquid;  $R_f$  0.31 (1:9 ethyl acetate : hexanes);  $^1\text{H}$  NMR (400 MHz,  $\text{CDCl}_3$ ):  $\delta$  6.99 (td,  $J = 8.0$  & 1.6 Hz, 1H), 7.17-7.23 (m, 1H), 7.28 (t,  $J = 7.6$  Hz, 1H), 7.52-7.58 (m, 2H), 7.64 (td,  $J = 8.0$  & 1.6 Hz, 1H), 7.82 (d,  $J = 8.0$  Hz, 1H), 8.58 (d,  $J = 4.8$  Hz, 1H);  $^{13}\text{C}$  NMR (100 MHz,  $\text{CDCl}_3$ ):  $\delta$  91.2, 92.0, 101.3, 123.2, 127.7, 128.0, 129.0, 130.2, 133.3, 136.3, 138.9, 143.3, 150.3; IR (neat): 2925, 2941, 2225, 2087, 848, 783, 761  $\text{cm}^{-1}$ .

### 1-Bromo-2-(phenylethynyl)benzene (45)<sup>11</sup>

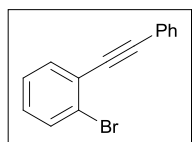

Pale yellow oil;  $R_f$  0.62 (in hexanes);  $^1\text{H}$  NMR (400 MHz,  $\text{CDCl}_3$ ):  $\delta$  7.18 (td,  $J = 7.6$  & 2.0 Hz, 1H), 7.30 (td,  $J = 7.6$  & 1.2 Hz, 1H), 7.34-7.39 (m, 3H), 7.54-7.64 (m, 4H);  $^{13}\text{C}$  NMR (100 MHz,  $\text{CDCl}_3$ ):  $\delta$  88.1, 94.1, 123.0, 125.5, 125.8, 127.2, 128.5, 128.8, 129.5, 131.8, 132.6, 133.4; IR (neat): 3063, 2984, 2223, 760, 692  $\text{cm}^{-1}$ .

### 1-Bromo-2-(*p*-tolylethynyl)benzene (46)<sup>11</sup>

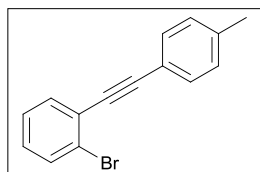

Pale yellow solid; mp 85-86 °C (lit. 86-87 °C);  $R_f$  0.66 (in hexanes);  $^1\text{H}$  NMR (400 MHz,  $\text{CDCl}_3$ ):  $\delta$  2.42 (s, 3H), 7.16-7.42 (m, 4H), 7.49-7.72 (m, 4H);  $^{13}\text{C}$  NMR (100 MHz,  $\text{CDCl}_3$ ):  $\delta$  21.7, 87.6, 94.3, 119.9, 125.7, 127.1, 129.3, 129.7, 131.7, 132.5, 133.3, 139.0, 139.6; IR (neat): 3056, 3025, 2918, 2853, 2214, 812, 750  $\text{cm}^{-1}$ ; HRMS ( $m/z$ ):  $[\text{M}+\text{H}]^+$  calcd. for  $\text{C}_{15}\text{H}_{12}\text{Br}$ : 271.0122; found: 271.0121.



## 2-((2-Bromophenyl)ethynyl)pyridine (47)

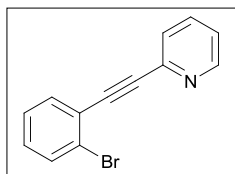

Yellow color liquid;  $R_f$  0.30 (1:9 ethyl acetate : hexanes);  $^1\text{H}$  NMR (400 MHz,  $\text{CDCl}_3$ ):  $\delta$  7.12-7.21 (m, 2H), 7.24 (td,  $J = 7.6$  & 1.2 Hz, 1H), 7.50-7.58 (m, 3H), 7.62 (td,  $J = 8.0$  & 2.0 Hz, 1H), 8.55-8.59 (m, 1H);  $^{13}\text{C}$  NMR (100 MHz,  $\text{CDCl}_3$ ):  $\delta$  87.7, 92.9, 123.2, 124.6, 126.0, 127.2, 127.7, 130.2, 132.6, 133.9, 136.3, 143.3, 150.3; IR (neat): 3053, 2983, 2253, 743, 651  $\text{cm}^{-1}$ ; HRMS ( $m/z$ ):  $[\text{M}+\text{H}]^+$  calcd. for  $\text{C}_{13}\text{H}_9\text{NBr}$ : 257.9918; found: 257.9912.

## References

- 1 G. Evindar and R. A. Batey, *J. Org. Chem.*, 2006, **71**, 1802.
- 2 K. C. Christiane, B. Benoit, P. Sandro, G. Nadine and P. Knochel, *Chem. Commun.*, 2007, 1954.
- 3 H. Nishioka, N. Chie, A. Hitoshi, T. Yasuo and H. Takashi, *Heterocycles*, 2006, **70**, 549.
- 4 I. Hiroki, E. Toru, T. Nozomi, O. Hiroaki and T. Tetsuaki, *J. Org. Chem.*, 2008, **73**, 7145.
- 5 N. Barbero, M. Carril, R. SanMartin and E. Domínguez, *Tetrahedron*, 2007, **63**, 10425.
- 6 C. Gimbert and V. Adelina, *Org. Lett.*, 2009, **11**, 269.
- 7 A. C. Spivey, J. McKendrick and R. Srikanan, *J. Org. Chem.*, 2003, **68**, 1843.
- 8 A. K. Verma, T. Kesharwani, J. Singh, V. Tandon and R. C. Larock, *Angew. Chem., Int. Ed.*, 2009, **48**, 1138.
- 9 M. J. Wu, L. J. Chang, L. M. Wei and C. F. Lin, *Tetrahedron*, 1999, **55**, 13193.
- 10 K. F. Tseng, C. F. Lin, Y. H. Lo, Y. L. Hu, L. Y. Chen, S. H. Yang, S. R. Lin, L. S. Chang and M. J. Wu, *Eur. J. Med. Chem.*, 2009, **44**, 35.
- 11 L. L. Sun, C. L. Deng, R. Y. Tang and X. G. Zhang, *J. Org. Chem.*, 2011, **76**, 7546.

### $^1\text{H}$ and $^{13}\text{C}$ spectra for all products

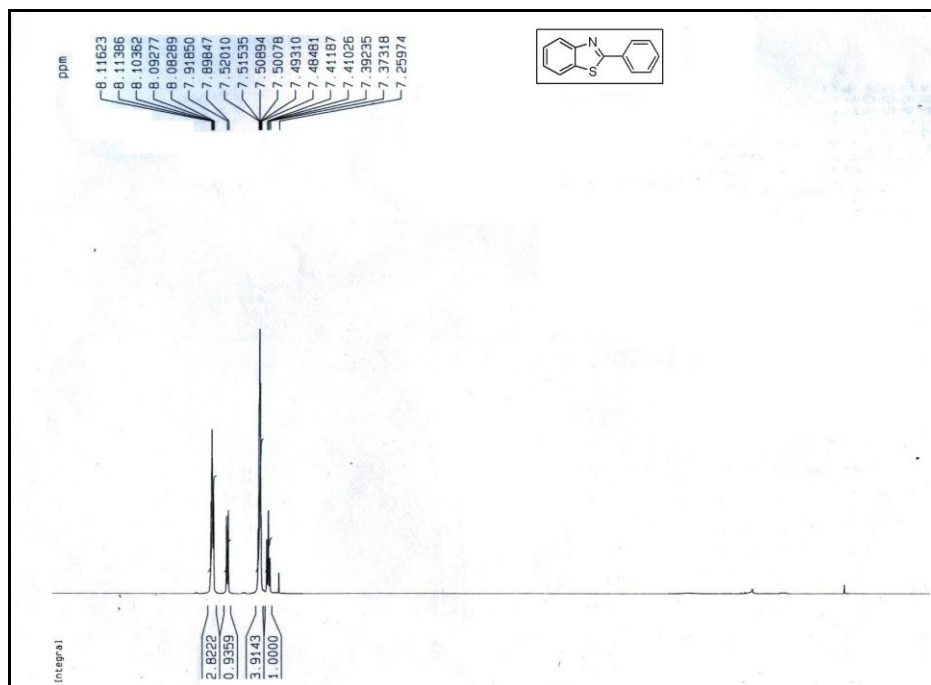

**Figure 1** 400 MHz  $^1\text{H}$  NMR spectrum of compound **3** in  $\text{CDCl}_3$

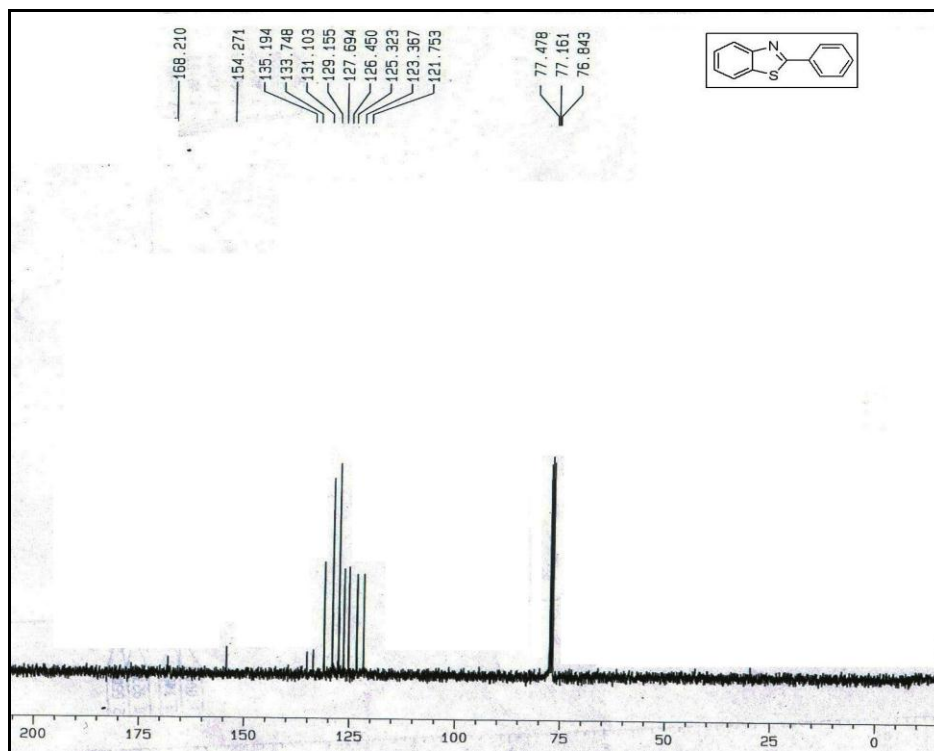

**Figure 2** 100 MHz  $^{13}\text{C}$  NMR spectrum of compound **3** in  $\text{CDCl}_3$

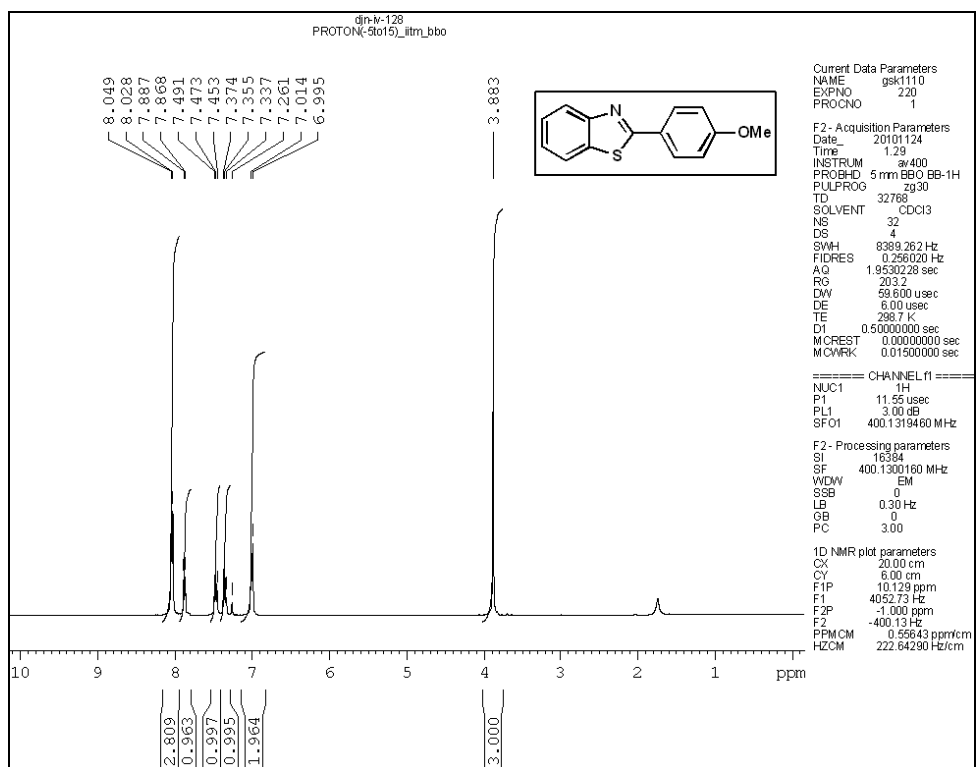

Figure 3 400 MHz  $^1\text{H}$  NMR spectrum of compound **5** in  $\text{CDCl}_3$

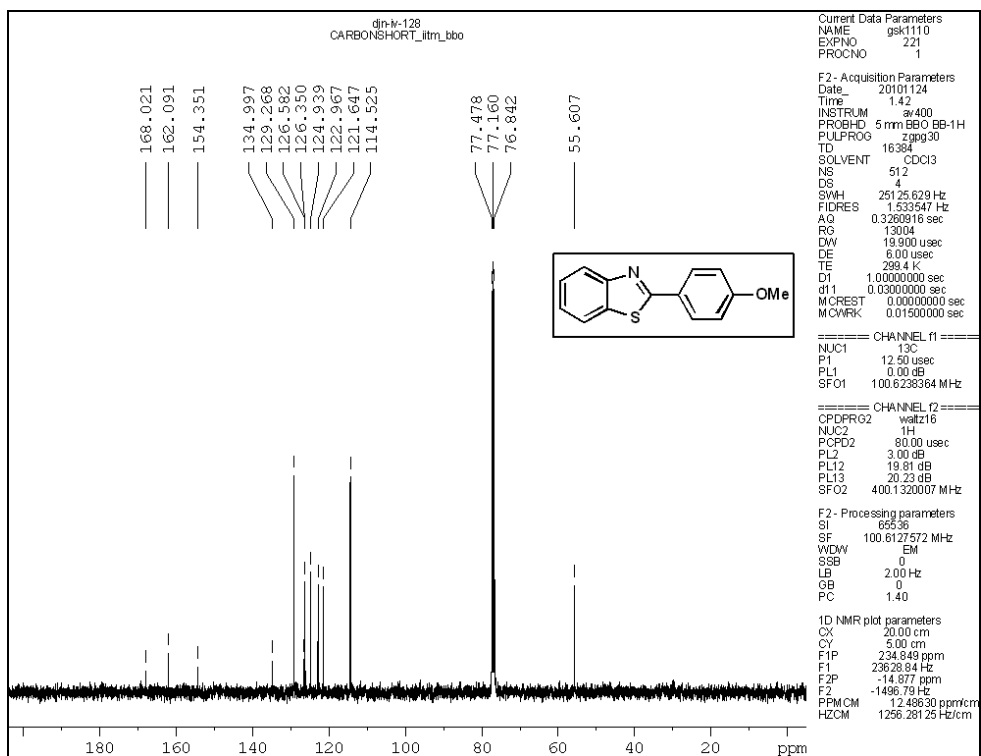

Figure 4 100 MHz  $^{13}\text{C}$  NMR spectrum of compound **5** in  $\text{CDCl}_3$

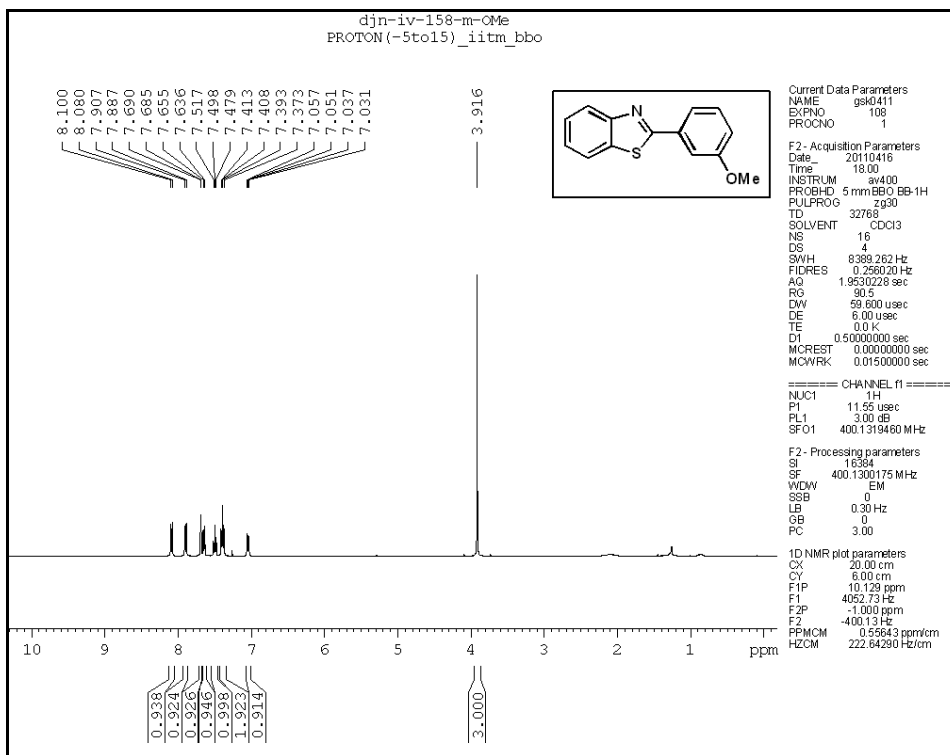

**Figure 5** 400 MHz  $^1\text{H}$  NMR spectrum of compound **7** in  $\text{CDCl}_3$

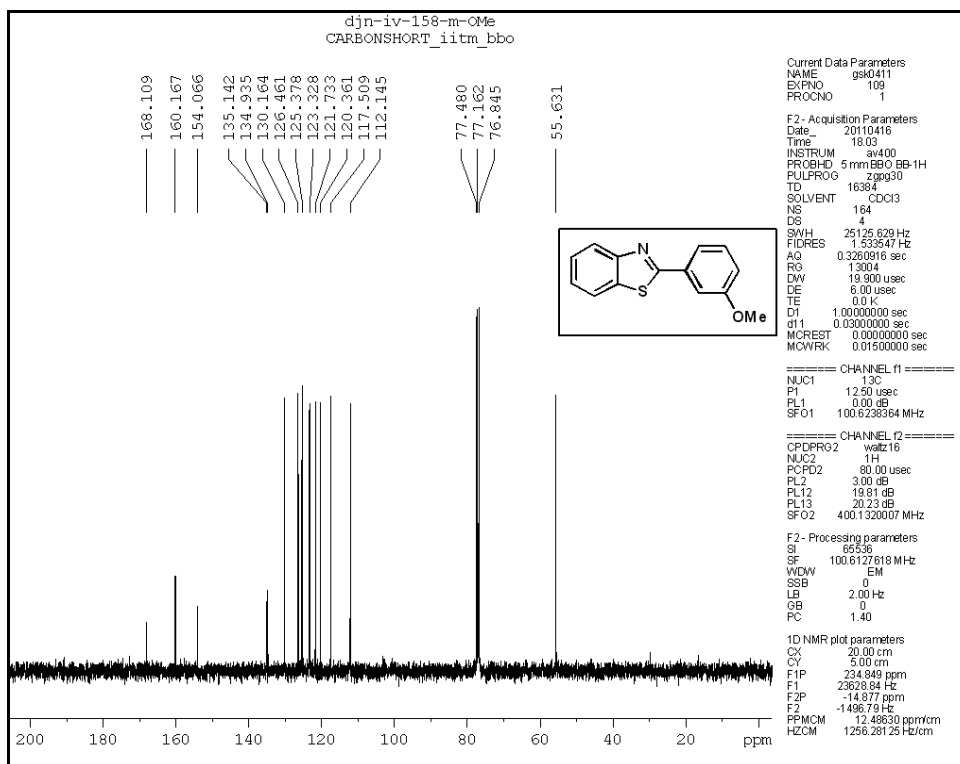

**Figure 6** 400 MHz  $^{13}\text{C}$  NMR spectrum of compound **7** in  $\text{CDCl}_3$

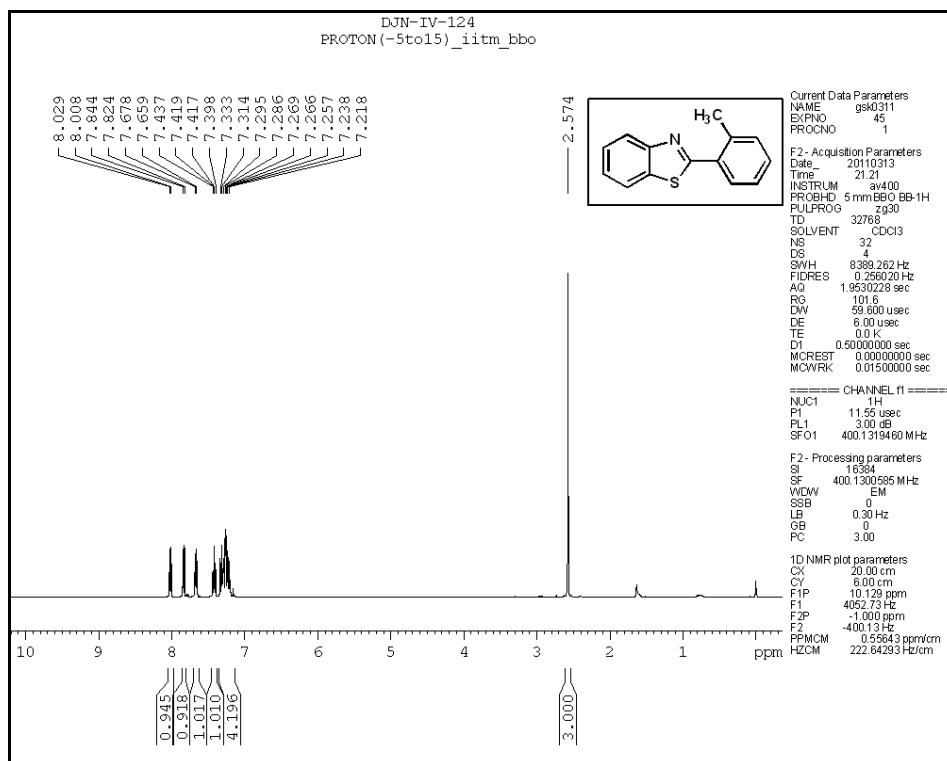

**Figure 7** 400 MHz  $^1\text{H}$  NMR spectrum of compound **9** in  $\text{CDCl}_3$

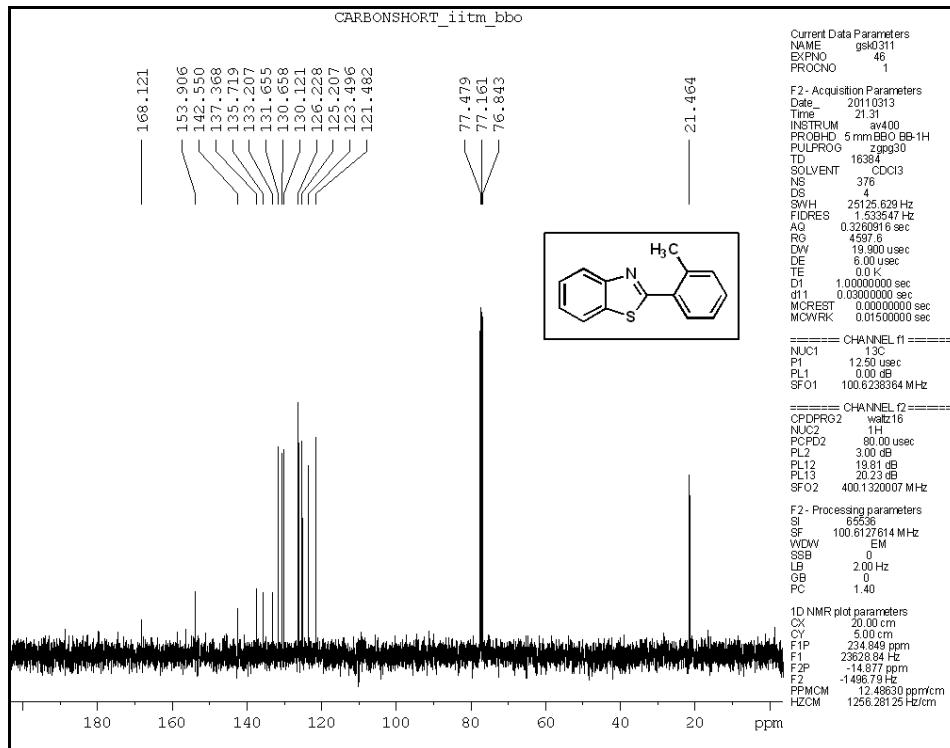

**Figure 8** 400 MHz  $^1\text{H}$  NMR spectrum of compound **9** in  $\text{CDCl}_3$

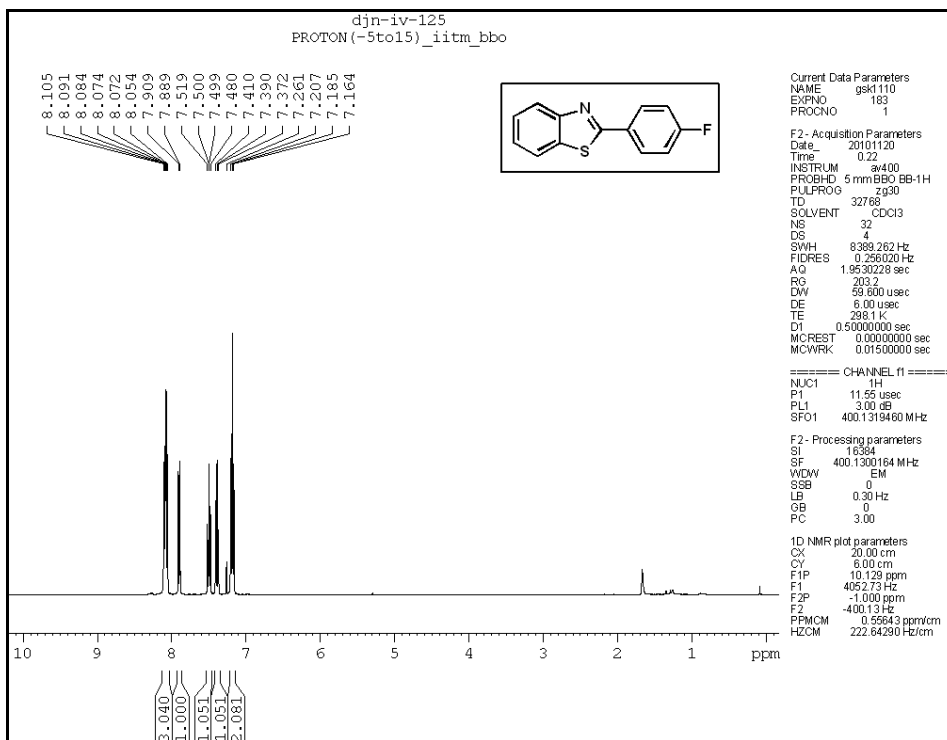

**Figure 9** 400 MHz  $^1\text{H}$  NMR spectrum of compound **11** in  $\text{CDCl}_3$

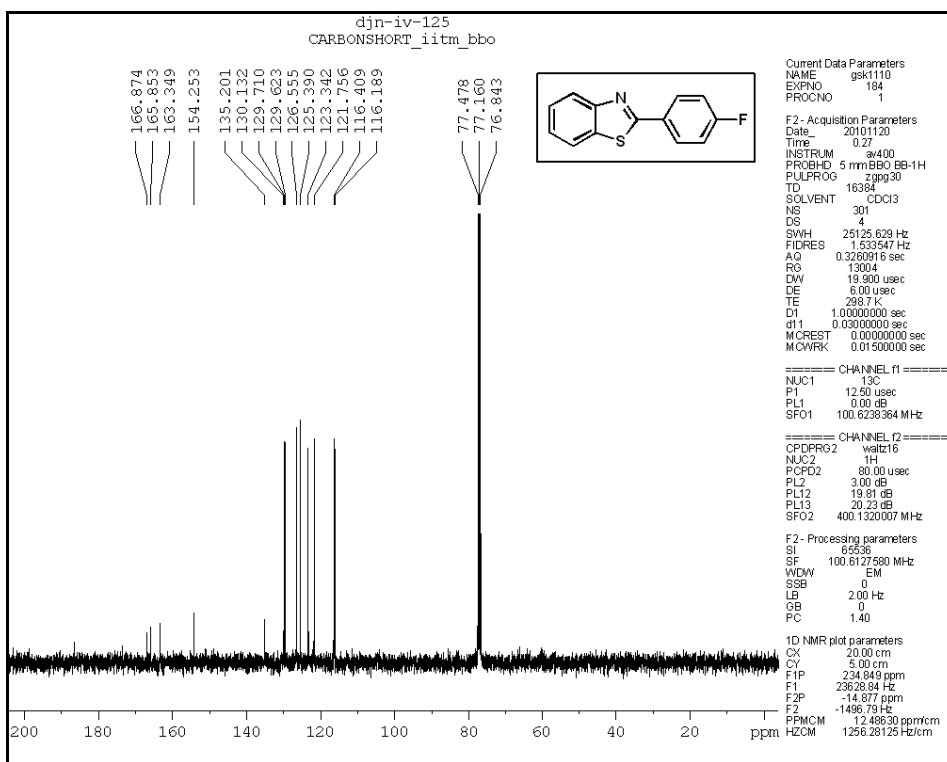

**Figure 10** 400 MHz  $^1\text{H}$  NMR spectrum of compound **11** in  $\text{CDCl}_3$

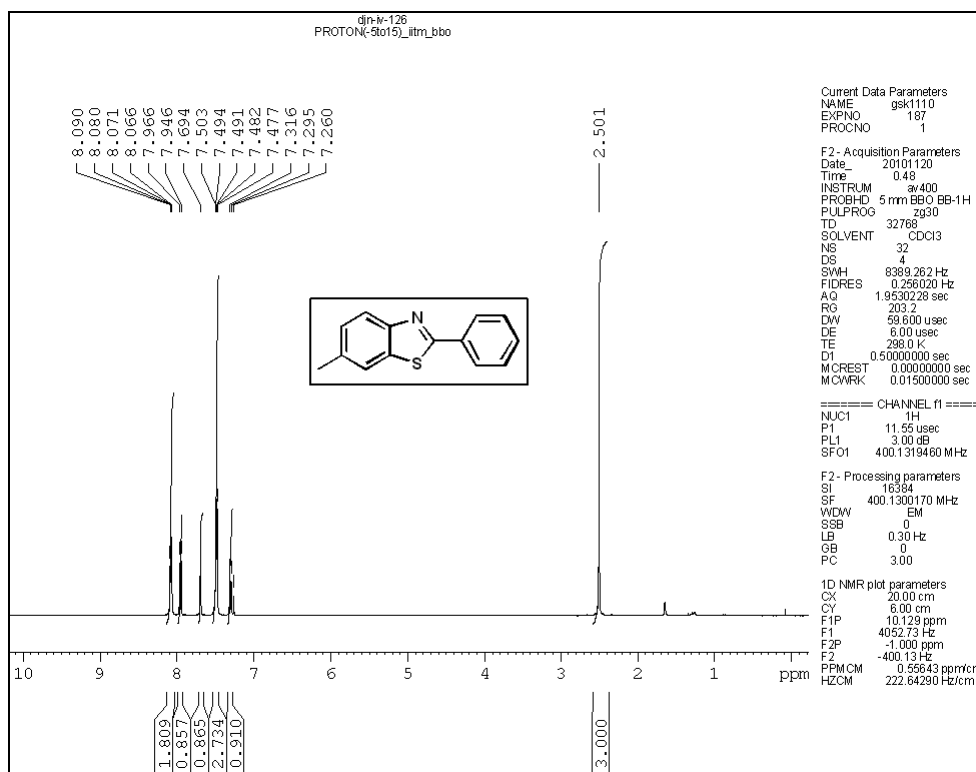

Figure 11 400 MHz  $^1\text{H}$  NMR spectrum of compound **13** in  $\text{CDCl}_3$

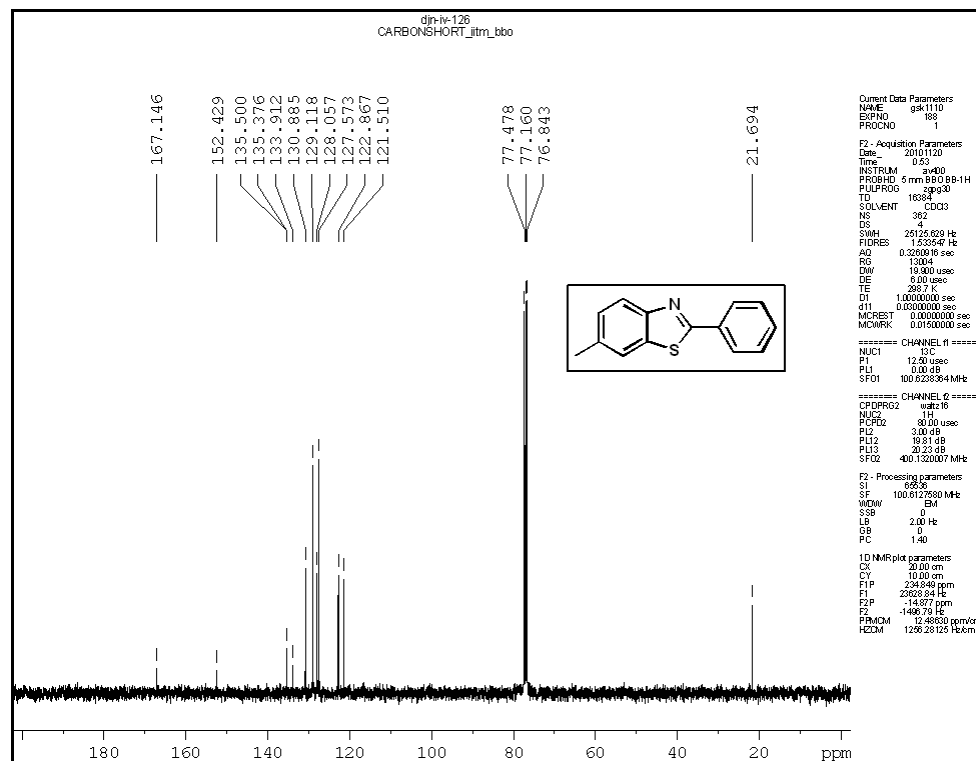

Figure 12 100 MHz  $^{13}\text{C}$  NMR spectrum of compound **13** in  $\text{CDCl}_3$

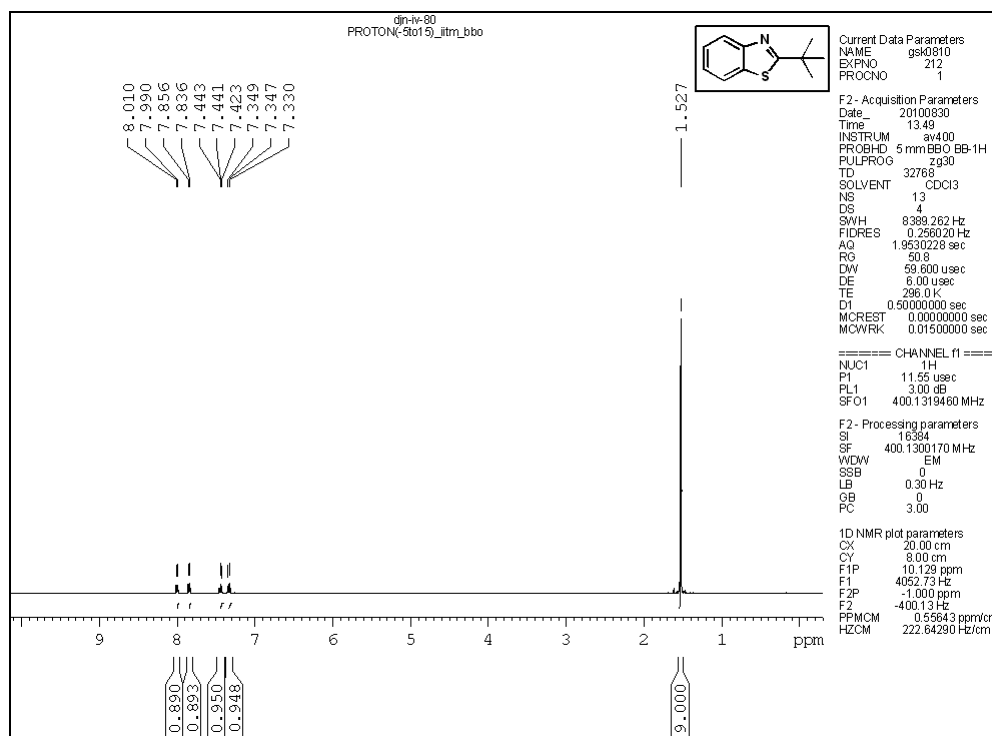

Figure 13 400 MHz  $^1\text{H}$  NMR spectrum of compound **15** in  $\text{CDCl}_3$

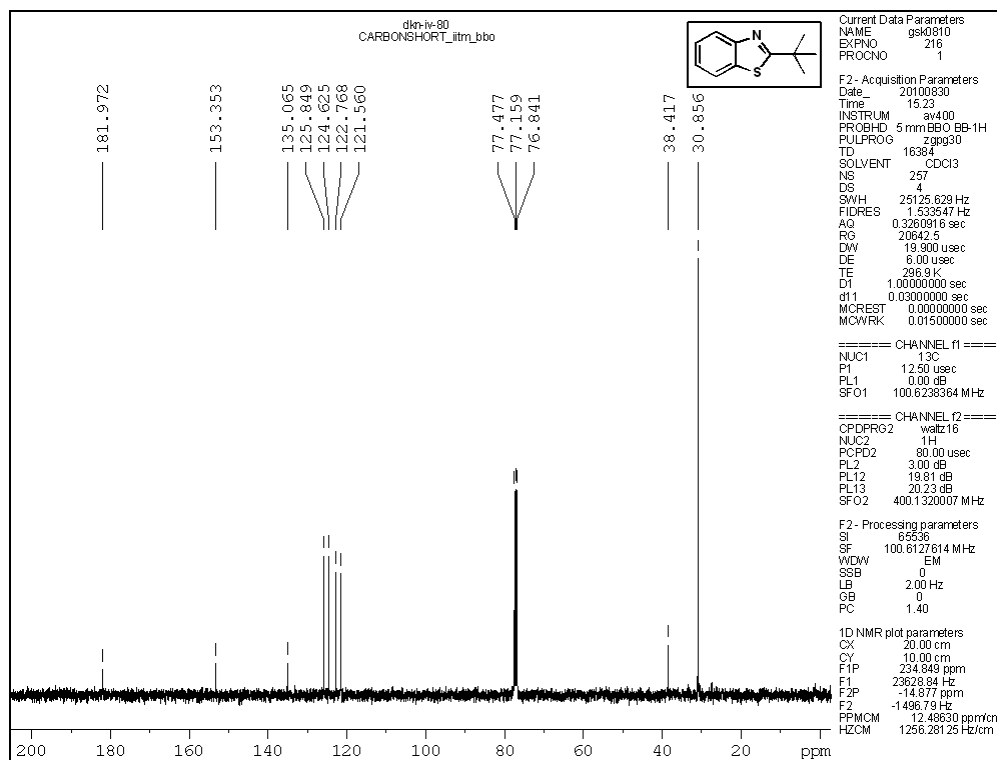

Figure 14 100 MHz  $^{13}\text{C}$  NMR spectrum of compound **15** in  $\text{CDCl}_3$



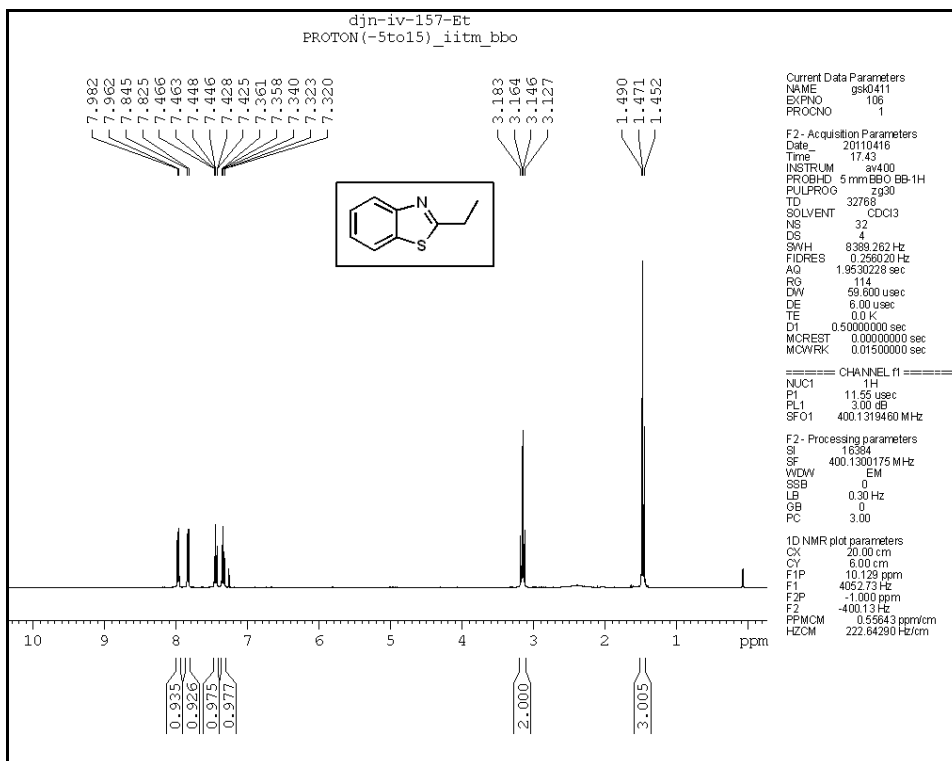

Figure 15 400 MHz  $^1\text{H}$  NMR spectrum of compound **17** in  $\text{CDCl}_3$

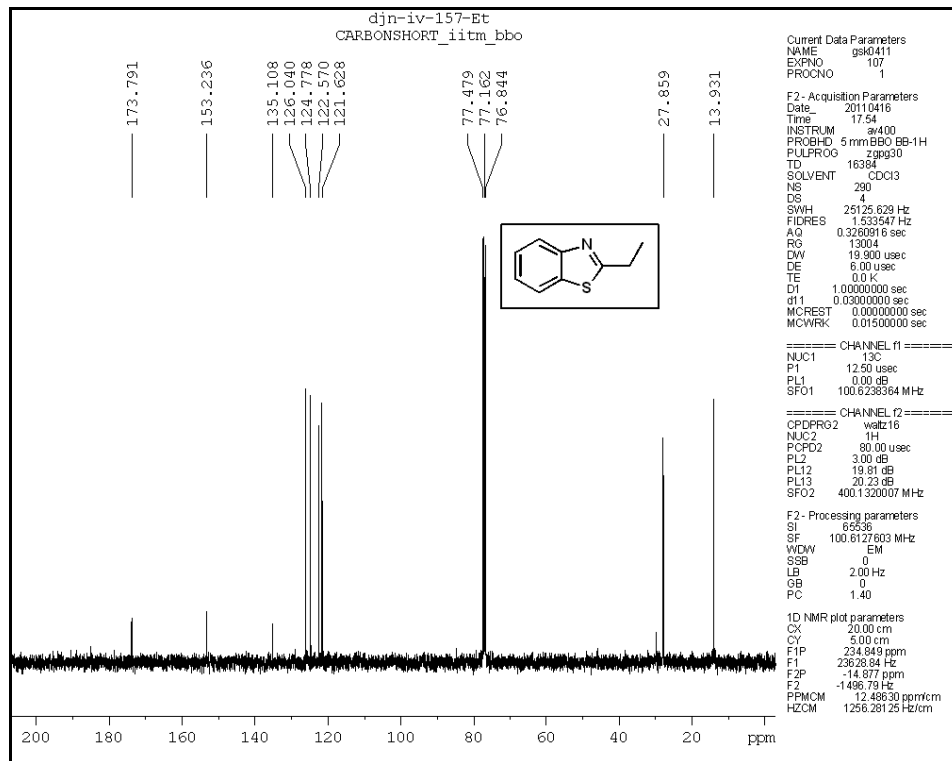

Figure 16 100 MHz  $^{13}\text{C}$  NMR spectrum of compound **17** in  $\text{CDCl}_3$

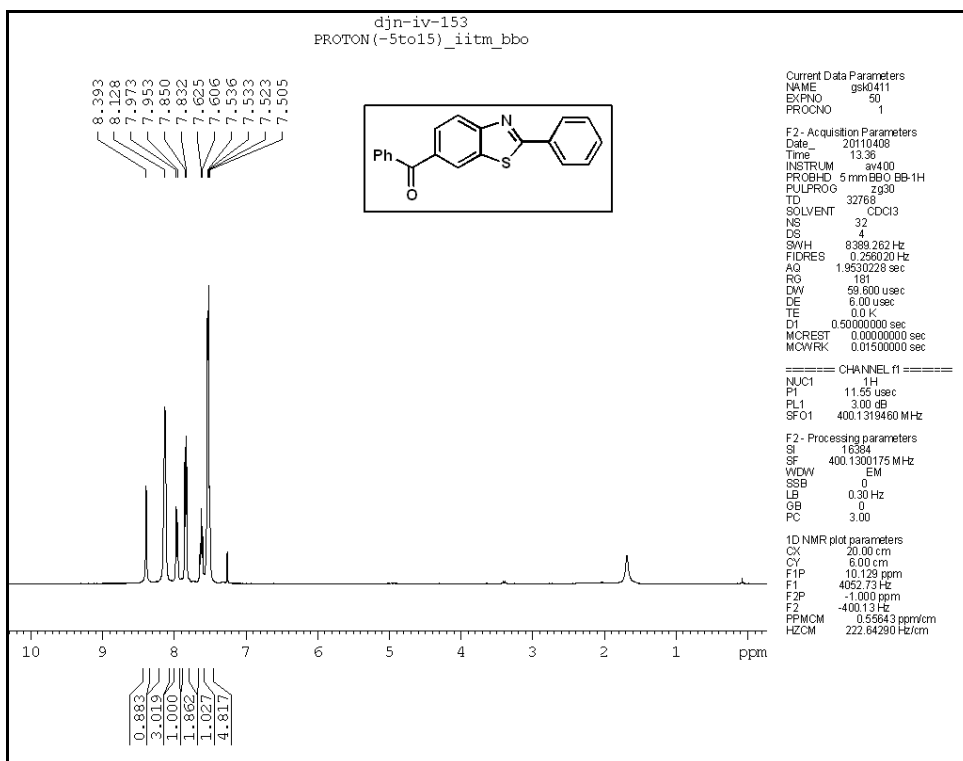

**Figure 17** 400 MHz  $^1\text{H}$  NMR spectrum of compound **19** in  $\text{CDCl}_3$

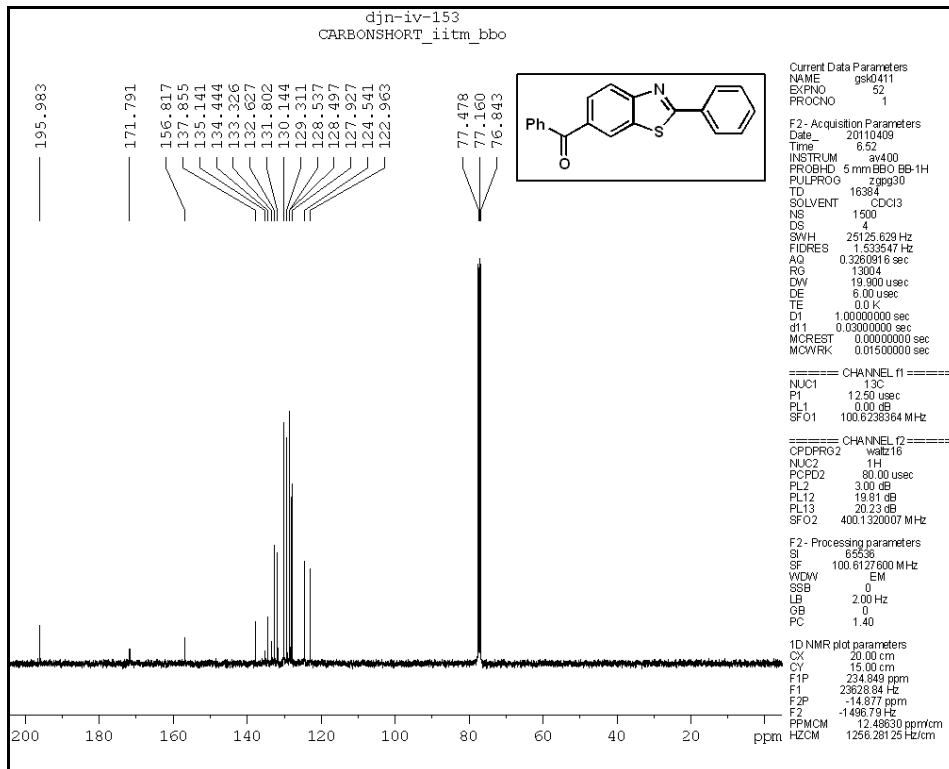

**Figure 18** 100 MHz  $^{13}\text{C}$  NMR spectrum of compound **19** in  $\text{CDCl}_3$

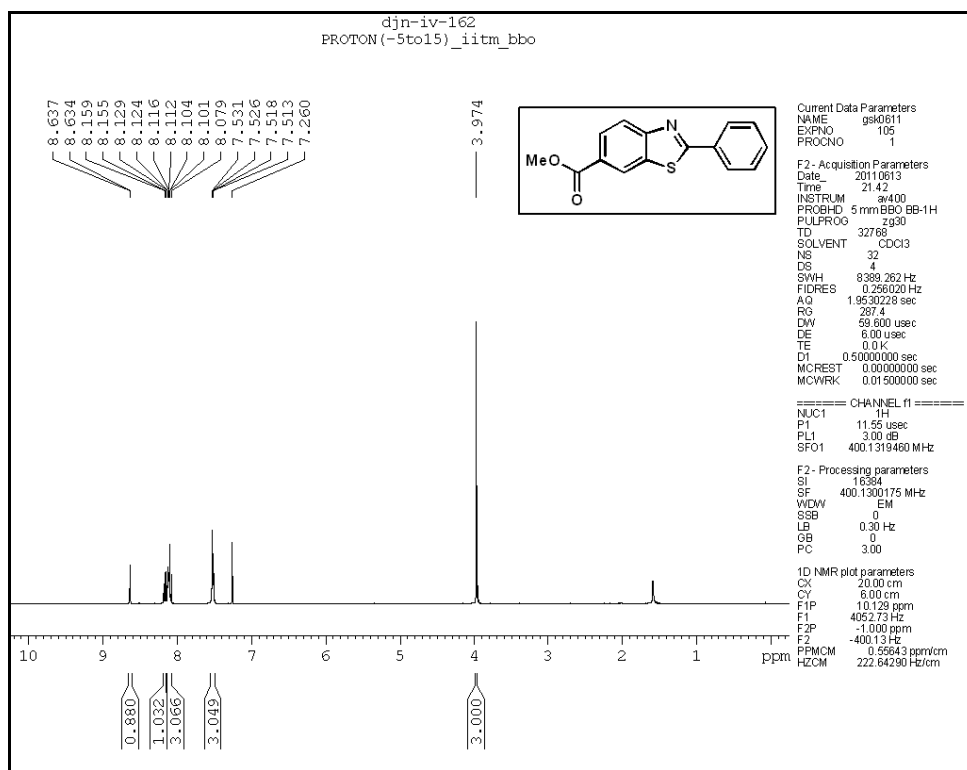

**Figure 19** 400 MHz  $^1\text{H}$  NMR spectrum of compound **21** in  $\text{CDCl}_3$

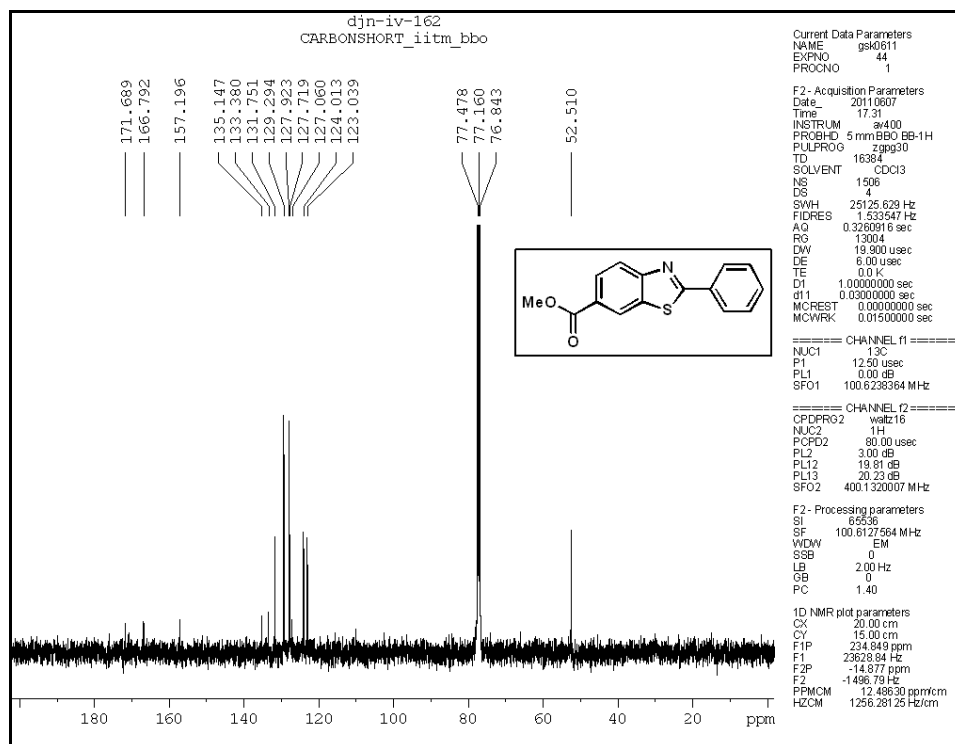

**Figure 20** 100 MHz  $^{13}\text{C}$  NMR spectrum of compound **21** in  $\text{CDCl}_3$

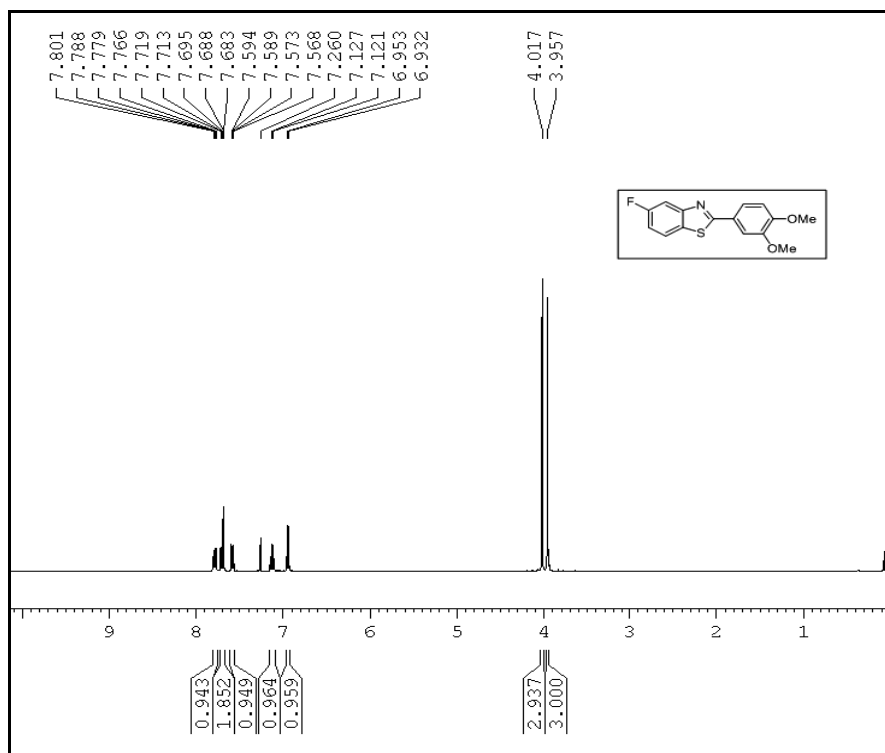

**Figure 21** 400 MHz  $^1\text{H}$  NMR spectrum of compound **25** in  $\text{CDCl}_3$

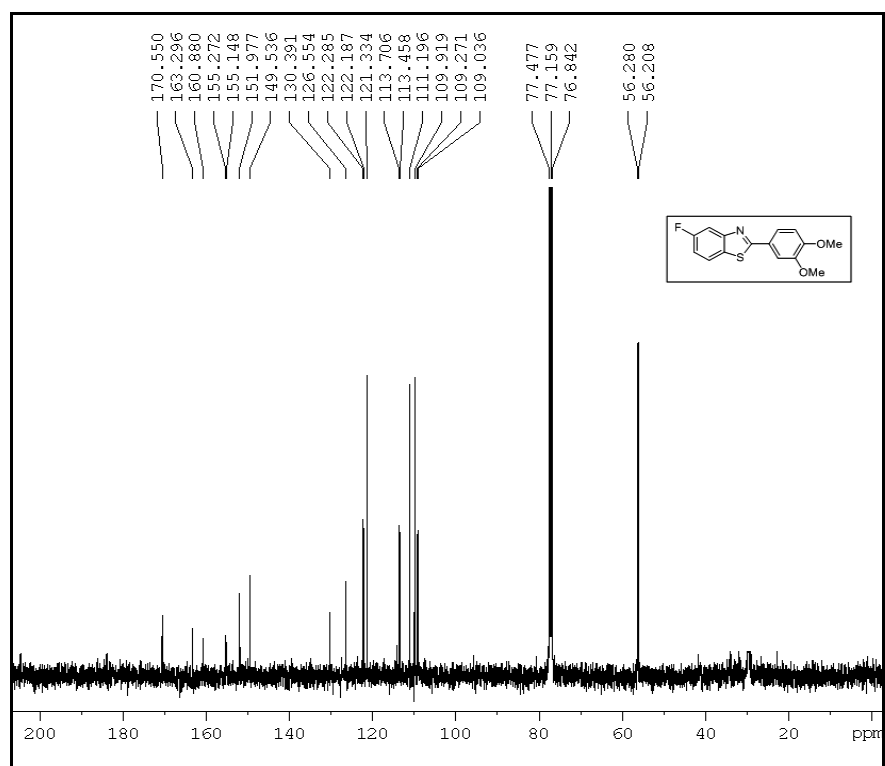

**Figure 22** 100 MHz  $^{13}\text{C}$  NMR spectrum of compound **25** in  $\text{CDCl}_3$

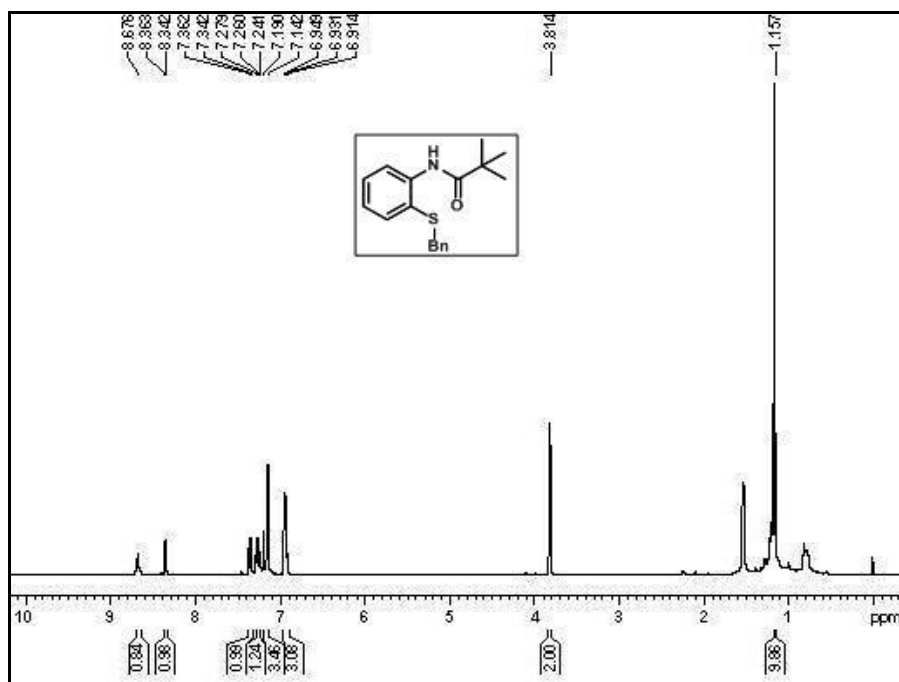

**Figure 23** 400 MHz  $^1\text{H}$  NMR spectrum of compound **28a** in  $\text{CDCl}_3$

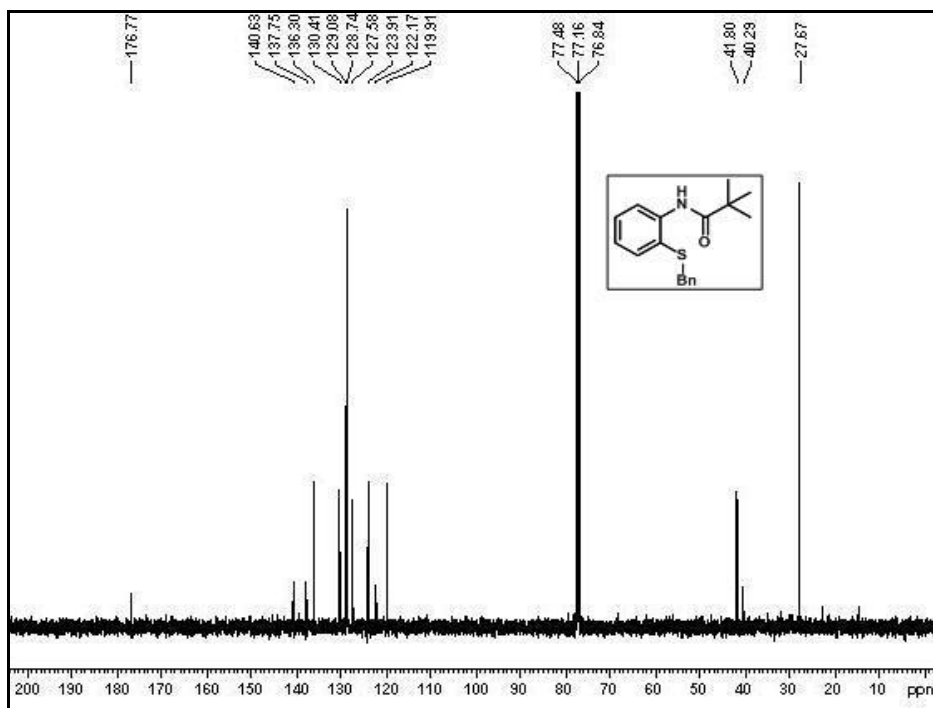

**Figure 24** 100 MHz  $^{13}\text{C}$  NMR spectrum of compound **28a** in  $\text{CDCl}_3$

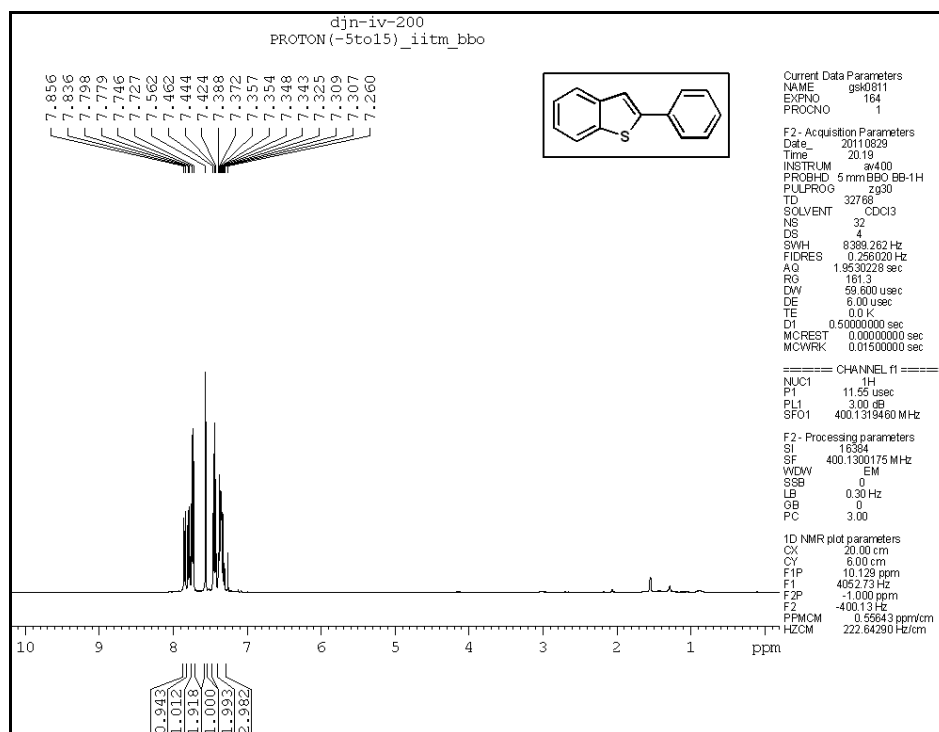

Figure 25 400 MHz  $^1\text{H}$  NMR spectrum of compound **32** in  $\text{CDCl}_3$

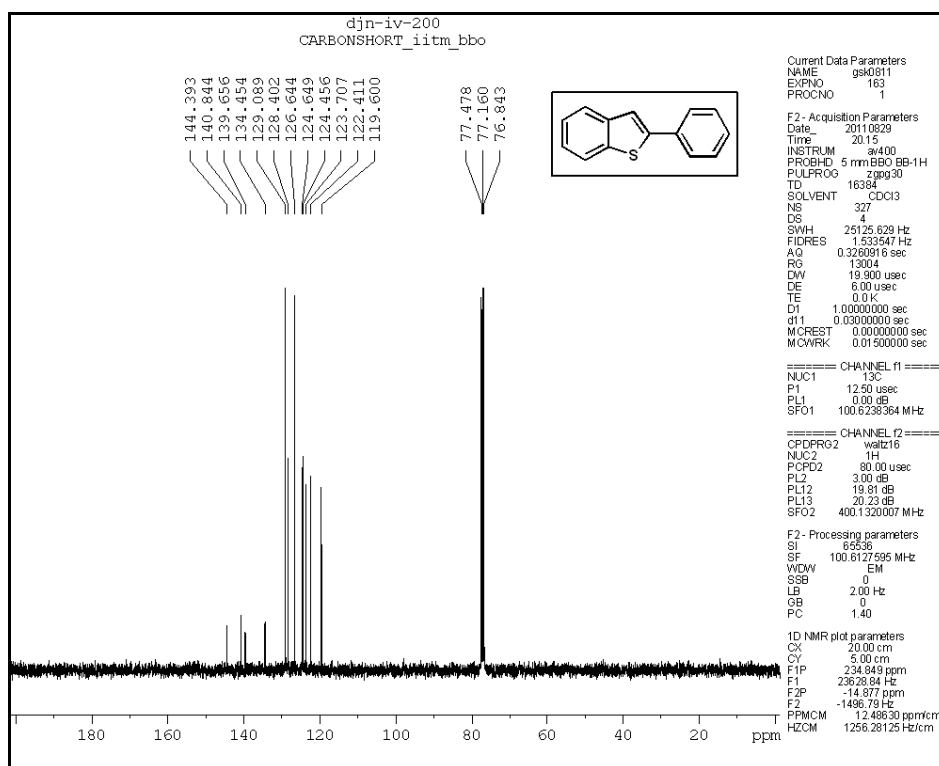

Figure 26 100 MHz  $^{13}\text{C}$  NMR spectrum of compound **32** in  $\text{CDCl}_3$

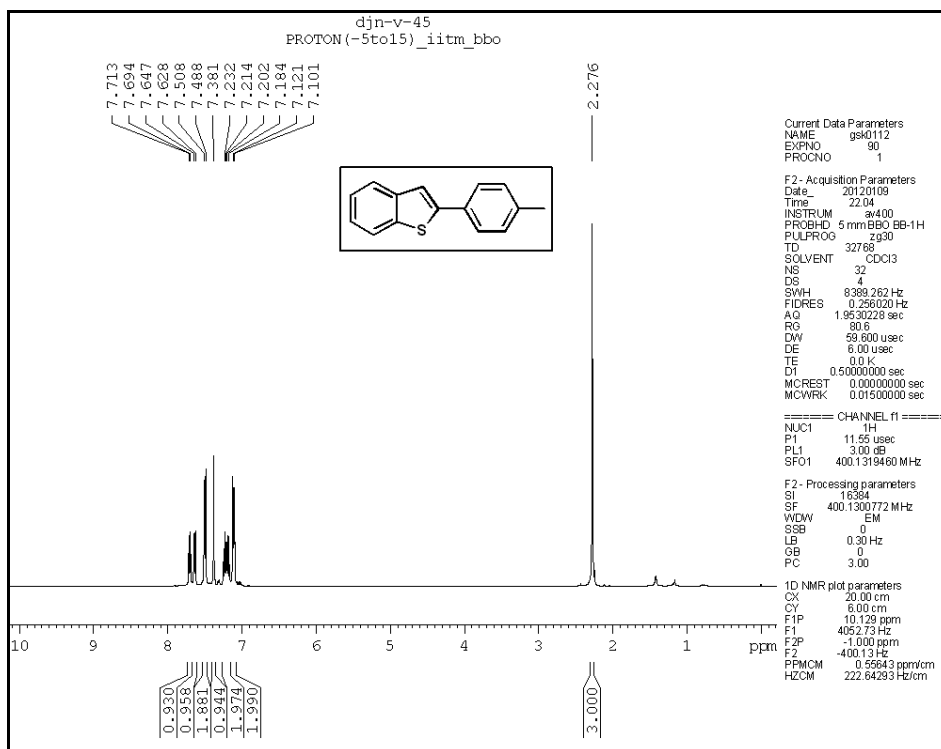

**Figure 27** 400 MHz  $^1\text{H}$  NMR spectrum of compound **34** in  $\text{CDCl}_3$

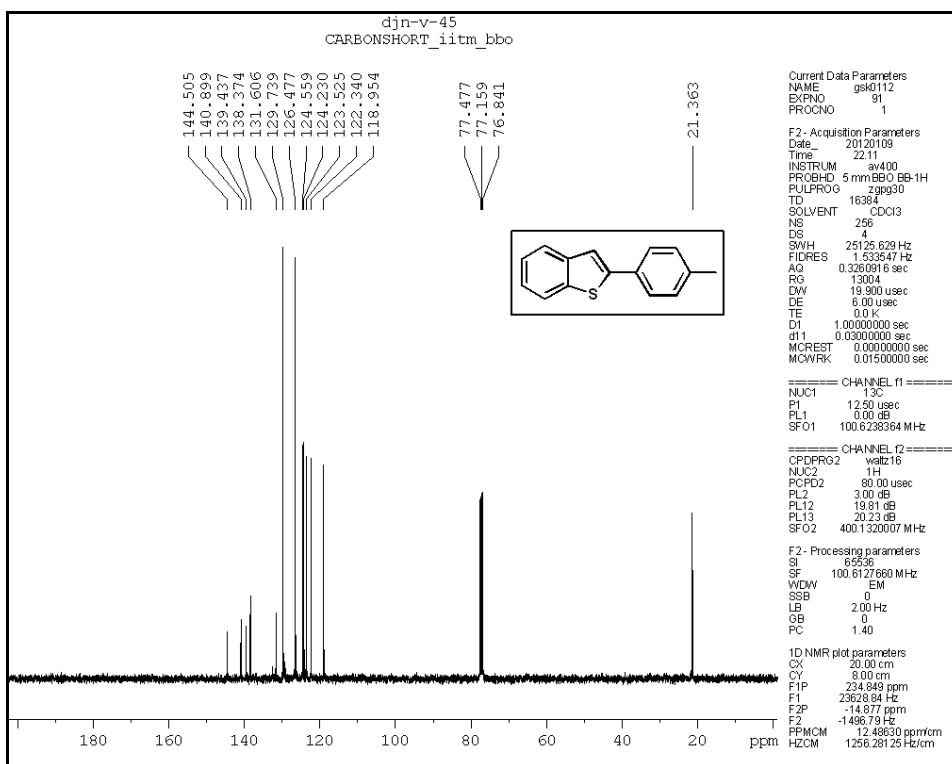

**Figure 28** 100 MHz  $^{13}\text{C}$  NMR spectrum of compound **34** in  $\text{CDCl}_3$

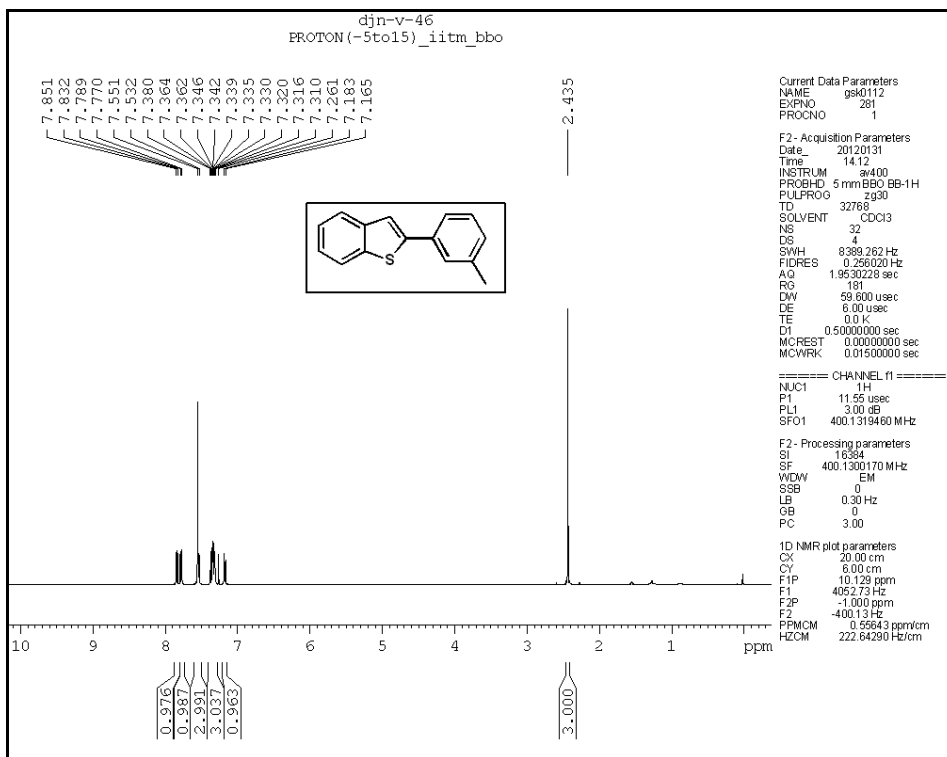

Figure 29 400 MHz  $^1\text{H}$  NMR spectrum of compound **36** in  $\text{CDCl}_3$

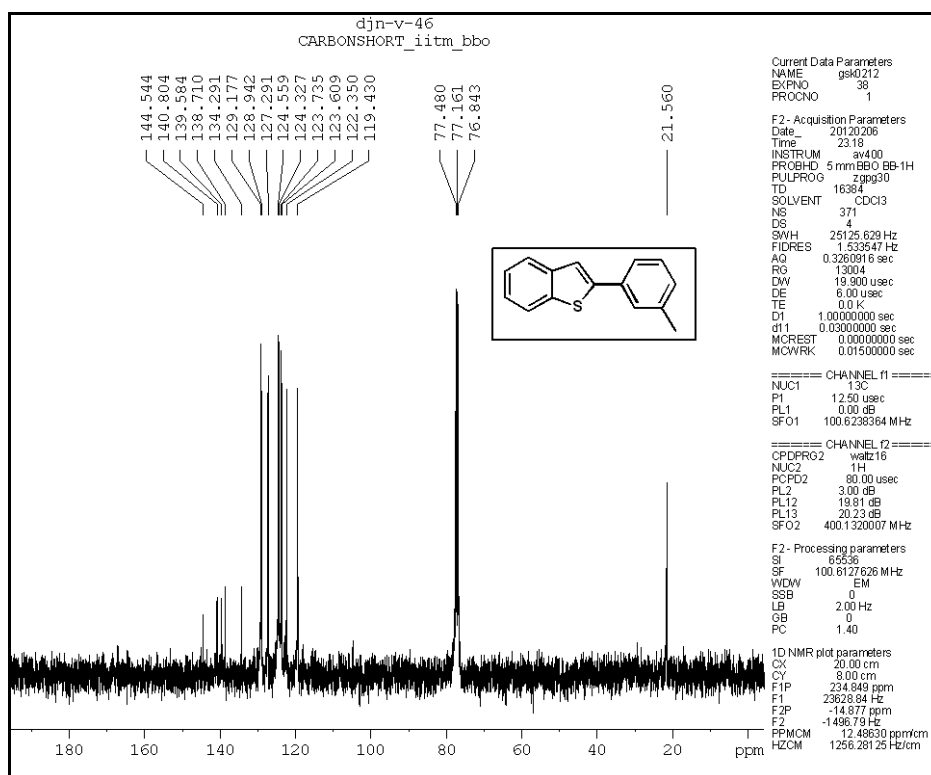

Figure 30 100 MHz  $^{13}\text{C}$  NMR spectrum of compound **36** in  $\text{CDCl}_3$



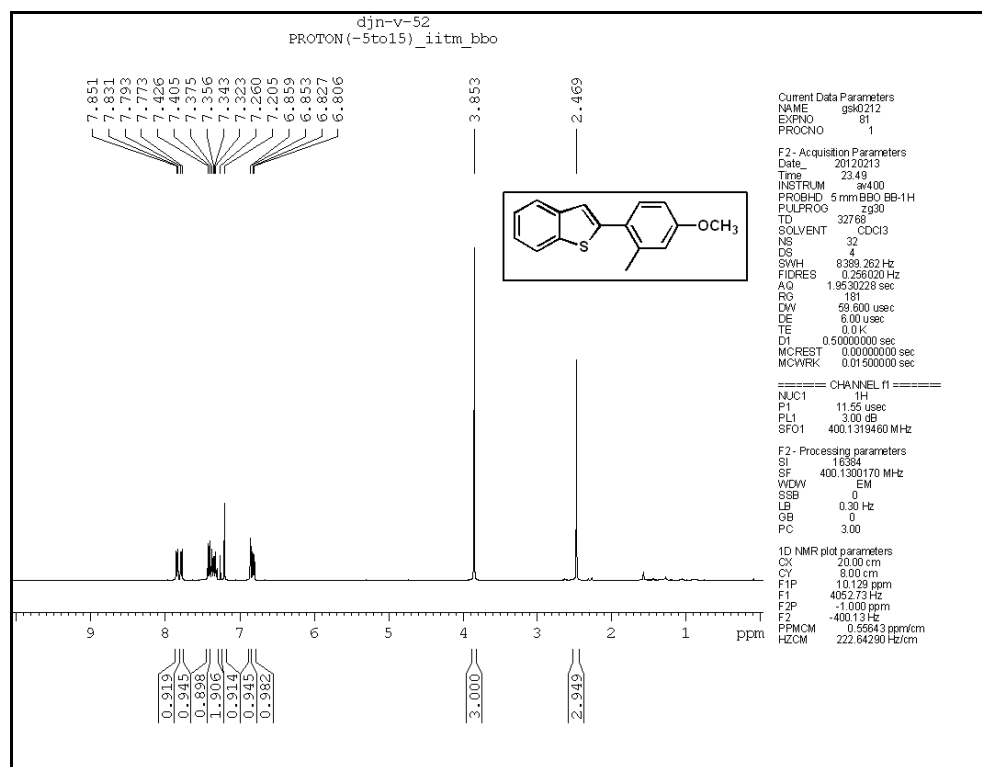

**Figure 31** 400 MHz  $^1\text{H}$  NMR spectrum of compound **38** in  $\text{CDCl}_3$

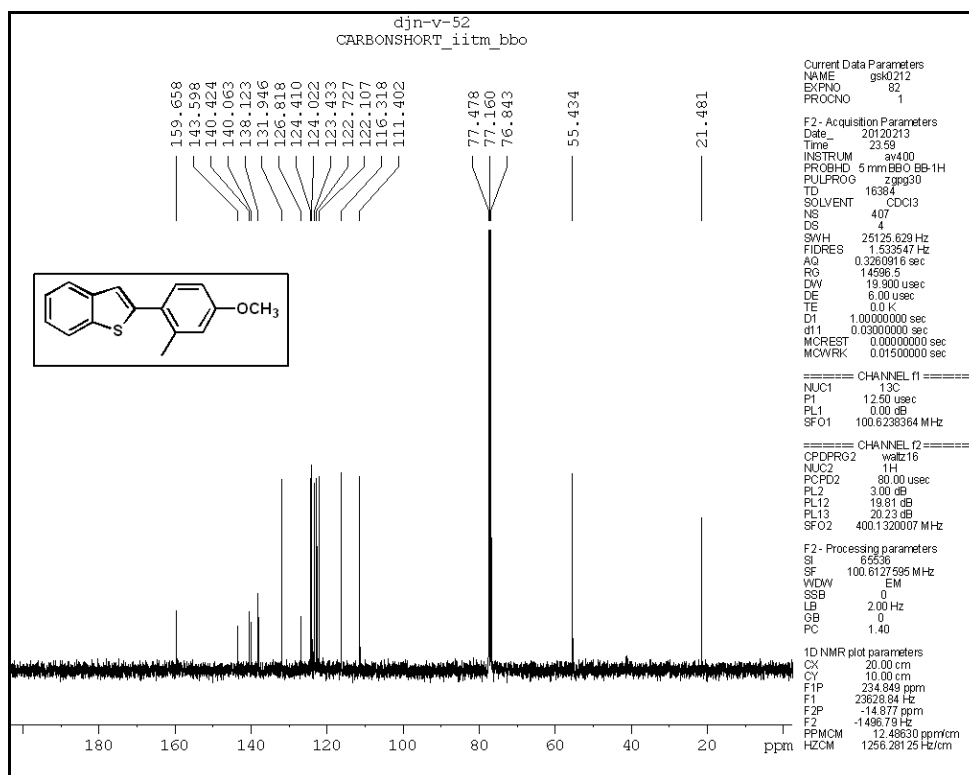

**Figure 32** 100 MHz  $^{13}\text{C}$  NMR spectrum of compound **38** in  $\text{CDCl}_3$

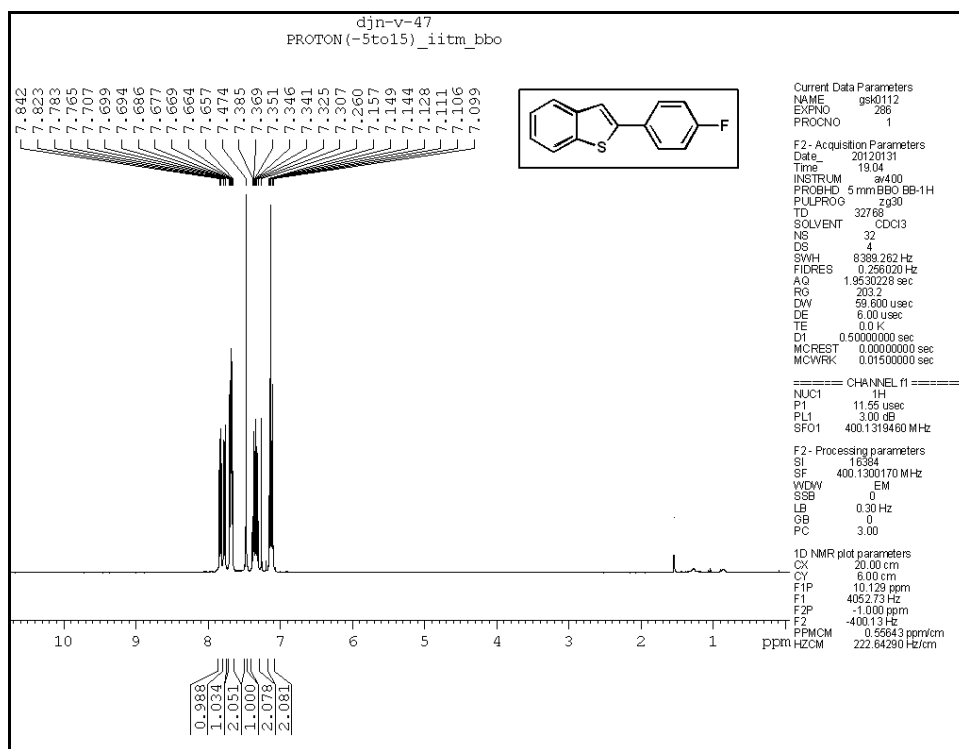

**Figure 33** 400 MHz  $^1\text{H}$  NMR spectrum of compound **40** in  $\text{CDCl}_3$

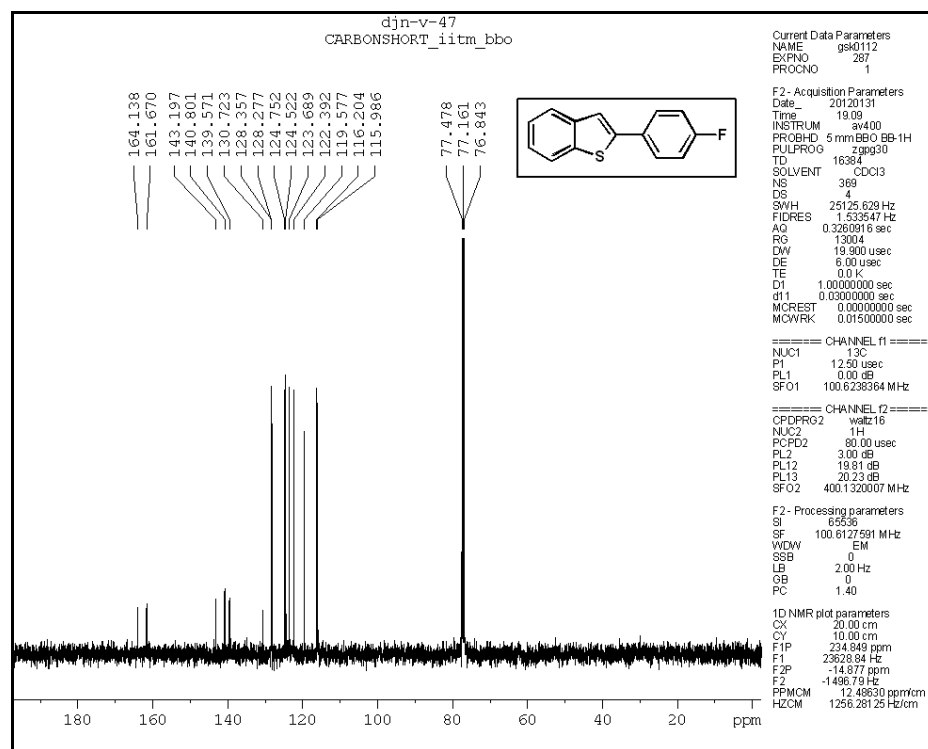

**Figure 34** 100 MHz  $^{13}\text{C}$  NMR spectrum of compound **40** in  $\text{CDCl}_3$

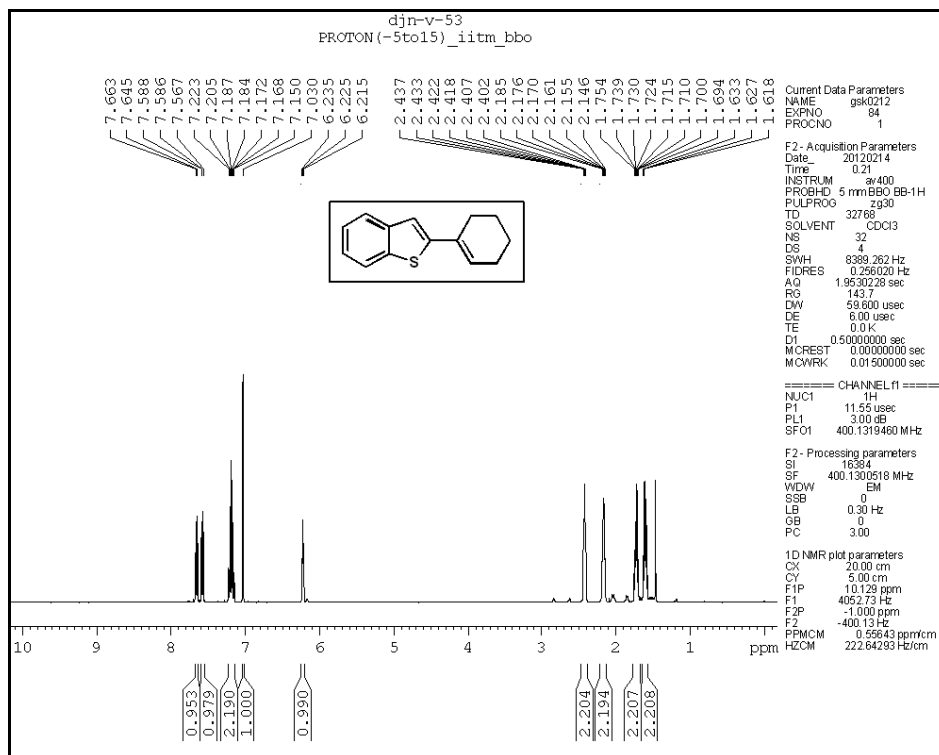

Figure 35 400 MHz  $^1\text{H}$  NMR spectrum of compound **42** in  $\text{CDCl}_3$

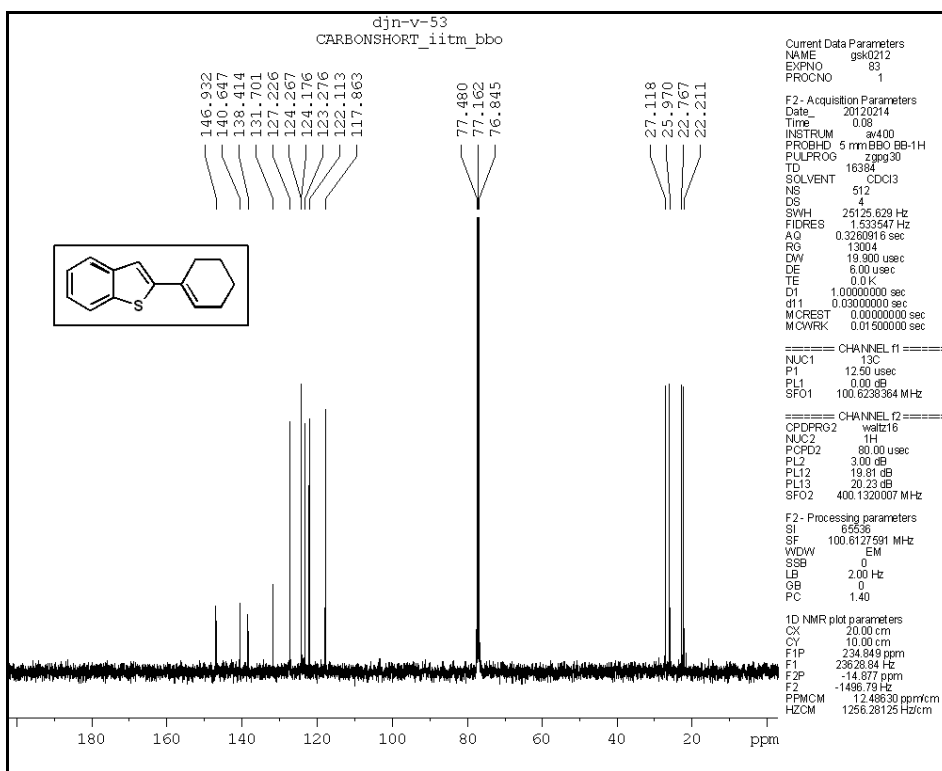

Figure 36 100 MHz  $^{13}\text{C}$  NMR spectrum of compound **42** in  $\text{CDCl}_3$

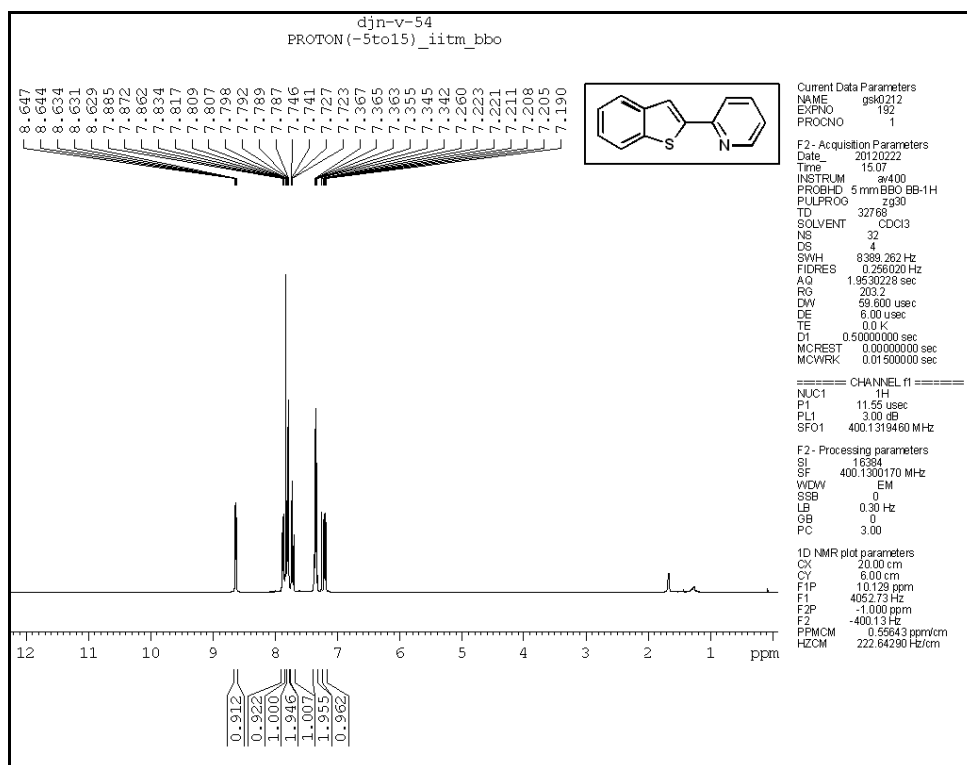

Figure 37 400 MHz  $^1\text{H}$  NMR spectrum of compound **44** in  $\text{CDCl}_3$

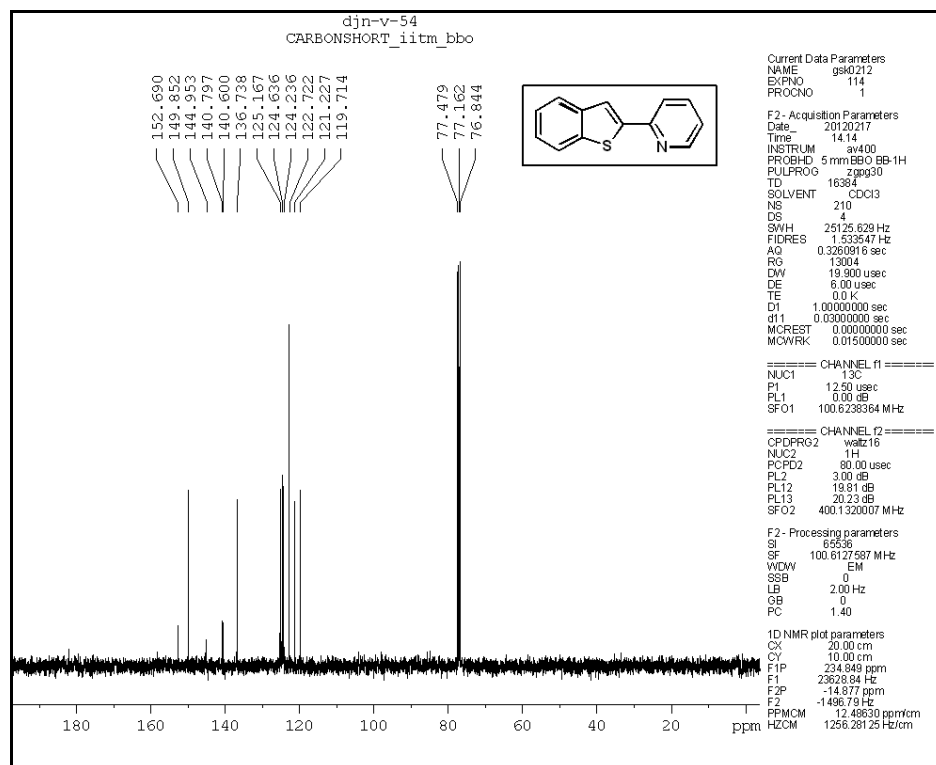

Figure 38 100 MHz  $^{13}\text{C}$  NMR spectrum of compound **44** in  $\text{CDCl}_3$
